# Supplementary material for: Predicting epidermal growth factor receptor (EGFR) mutation status in non-small cell lung cancer (NSCLC) patients through logistic regression: a model incorporating clinical characteristics, computed tomography (CT) imaging features, and tumor marker levels
Source: PeerJ. 2024 Dec 3;12:e18618. doi: 10.7717/peerj.18618 (PMC11623057; doi:10.7717/peerj.18618)
Supplement: Supplemental Information 1 [file peerj-12-18618-s001.xlsx]

## Sheet: The primary cohort
EGFR Mutation Status	Sex	Age (years)	Diameter (mm)	T Stage	N Stage	M Stage	TNM Stage	Family History of Cancer	Personal History of Cancer	Smoking	Alcohol Consumption	Emphysema	Nodule Location	Number of Nodules	Type of Nodule	Margin	Cavity Sign	Vacuolar Sign	Spiculation Sign	Lobulation Sign	Pleural Indentation Sign	Calcification	Clustering Sign	Air Bronchogram	Central or Peripheral	Enlargement of Mediastinal Lymph Nodes	Pathological Value of Biopsy	CEA (Carcinoembryonic Antigen,ng/ml)	CYFRA 21-1 (Cytokeratin 19 Fragments,ng/ml)
yes	female	34	28	1	3	1	4	no	no	no	no	no	right lower lobe of the lung	4	solid nodule	regular	no	yes	yes	no	yes	no	yes	yes	no	yes	adenocarcinoma	8.21	2.73
yes	female	72	28	1	2	1	4	no	no	no	no	no	left upper lobe of the lung	4	solid nodule	regular	no	no	no	no	no	no	no	no	no	yes	adenocarcinoma	11.7	1.38
no	male	46	16	1	0	1	4	no	no	yes	no	no	left lower lobe of the lung	1	solid nodule	regular	no	no	yes	yes	yes	no	yes	yes	no	yes	adenocarcinoma	2.73	5.83
no	female	58	21	1	3	1	4	no	no	no	no	no	right lower lobe of the lung	1	solid nodule	regular	no	yes	yes	no	yes	no	yes	no	no	yes	adenocarcinoma	25.85	1.78
yes	female	74	17	1	0	0	1	no	no	no	no	no	right upper lobe of the lung	2	subsolid nodule	regular	no	no	no	yes	no	no	yes	no	no	yes	adenocarcinoma	3.982	0.59
yes	female	55	32	2	3	1	4	no	no	no	no	no	right lower lobe of the lung	3	solid nodule	regular	no	yes	yes	yes	yes	no	yes	yes	no	no	adenocarcinoma	2.43	8.67
yes	female	81	35	2	3	1	4	yes	no	no	no	yes	right upper lobe of the lung	4	solid nodule	regular	no	no	yes	yes	yes	no	yes	yes	no	yes	Non-small cell lung cancer other than adenocarcinoma	22.79	2.44
no	male	76	50	2	2	0	3	no	no	yes	yes	yes	right lower lobe of the lung	1	solid nodule	regular	no	no	yes	yes	yes	no	yes	yes	no	yes	adenocarcinoma	257.18	7.44
yes	male	50	91	4	2	1	4	no	no	yes	no	no	right lower lobe of the lung	4	solid nodule	regular	no	no	no	no	no	no	yes	yes	yes	yes	adenocarcinoma	230.15	12.63
no	female	68	21	1	3	1	4	no	no	no	no	no	right upper lobe of the lung	4	solid nodule	regular	no	no	yes	no	yes	no	yes	no	no	yes	adenocarcinoma	159.72	3.81
yes	male	55	68	3	1	1	4	no	no	no	no	no	right upper lobe of the lung	1	solid nodule	regular	no	no	no	yes	yes	no	yes	yes	no	yes	adenocarcinoma	102.4	17.05
no	male	68	33	2	2	1	4	no	yes	no	no	yes	right upper lobe of the lung	2	solid nodule	regular	no	no	yes	no	yes	no	yes	yes	no	yes	adenocarcinoma	368.266	3.3
yes	female	74	38	2	1	1	4	no	yes	no	no	no	left lower lobe of the lung	1	solid nodule	regular	no	yes	no	no	no	no	yes	yes	no	no	adenocarcinoma	4.34	2.48
no	male	67	30	1	0	0	1	no	no	yes	yes	yes	left lower lobe of the lung	1	solid nodule	regular	no	no	yes	yes	no	no	yes	no	no	no	Non-small cell lung cancer other than adenocarcinoma	1.209	4.8
yes	male	70	27	1	1	1	4	no	no	yes	yes	no	right upper lobe of the lung	1	solid nodule	regular	no	yes	yes	yes	yes	no	yes	no	no	yes	adenocarcinoma	349.574	7.99
yes	female	68	31	2	2	0	3	no	yes	no	no	no	right upper lobe of the lung	1	solid nodule	regular	no	no	no	yes	yes	no	yes	yes	no	no	adenocarcinoma	2.445	1.31
no	female	60	20	1	2	1	4	yes	no	no	no	no	right middle lobe of the lung	1	solid nodule	regular	no	no	no	yes	yes	no	yes	no	no	yes	adenocarcinoma	5.96	2.44
yes	female	72	78	4	3	1	4	no	no	no	no	no	right lower lobe of the lung	4	solid nodule	regular	no	no	no	yes	no	no	yes	yes	no	yes	adenocarcinoma	52.85	3.07
yes	male	55	23	1	3	1	4	no	no	no	no	no	right lower lobe of the lung	1	solid nodule	regular	no	no	yes	no	yes	no	no	no	no	no	adenocarcinoma	3.77	3.85
no	male	70	13	1	0	0	1	no	no	no	no	no	right lower lobe of the lung	2	solid nodule	regular	no	no	no	yes	no	no	yes	no	no	no	adenocarcinoma	2.039	2.18
no	male	36	45	2	3	1	4	no	no	no	no	no	left lower lobe of the lung	1	solid nodule	regular	no	no	no	no	no	no	yes	yes	no	yes	adenocarcinoma	15.43	72.41
no	male	66	50	2	2	0	3	no	no	yes	no	yes	left lower lobe of the lung	2	solid nodule	regular	no	yes	yes	yes	no	no	yes	yes	no	no	adenocarcinoma	30.79	5.89
yes	female	68	21	1	1	0	2	no	no	no	no	no	right lower lobe of the lung	1	solid nodule	regular	no	no	yes	yes	no	no	yes	yes	no	no	adenocarcinoma	0.634	1.77
no	female	61	16	1	0	1	4	no	no	no	no	no	left upper lobe of the lung	2	solid nodule	regular	no	no	yes	no	yes	no	yes	no	no	no	adenocarcinoma	1.436	2.46
no	male	45	36	2	1	0	2	no	yes	yes	yes	no	right upper lobe of the lung	1	solid nodule	regular	no	no	no	yes	yes	no	yes	yes	no	no	Non-small cell lung cancer other than adenocarcinoma	1.89	2.01
no	female	67	41	2	3	1	4	yes	no	no	no	no	right lower lobe of the lung	1	solid nodule	regular	no	no	yes	no	no	no	yes	yes	yes	no	adenocarcinoma	17.139	4.06
no	male	76	27	1	1	1	4	no	no	no	no	yes	right lower lobe of the lung	4	solid nodule	regular	yes	no	yes	yes	yes	no	yes	no	no	no	adenocarcinoma	2.5	7.98
no	female	48	30	1	1	0	2	no	no	no	no	no	left upper lobe of the lung	1	solid nodule	regular	no	no	no	yes	no	no	yes	yes	no	no	adenocarcinoma	0.89	1.49
yes	male	68	27	1	0	0	1	yes	yes	no	no	yes	left upper lobe of the lung	2	solid nodule	regular	no	no	yes	yes	yes	no	yes	yes	no	no	adenocarcinoma	30.63	3.14
yes	female	62	39	2	2	0	3	no	no	no	no	no	right lower lobe of the lung	1	solid nodule	regular	no	no	no	yes	no	no	yes	yes	no	yes	adenocarcinoma	2.015	2.07
yes	female	69	39	2	1	0	2	no	no	no	no	no	right lower lobe of the lung	1	solid nodule	regular	no	no	yes	yes	yes	yes	yes	yes	no	no	adenocarcinoma	2.97	28.5
no	female	55	17	1	0	0	1	no	no	no	no	no	right upper lobe of the lung	1	solid nodule	regular	no	yes	yes	yes	yes	no	yes	no	no	no	adenocarcinoma	0.42	0.97
yes	female	69	23	1	0	0	1	no	no	no	no	no	left upper lobe of the lung	2	solid nodule	regular	no	no	yes	no	no	no	yes	no	no	no	adenocarcinoma	1.07	2.4
yes	male	65	89	4	3	1	4	no	no	no	no	no	right upper lobe of the lung	2	solid nodule	regular	no	no	yes	yes	no	no	yes	yes	no	yes	adenocarcinoma	35.375	20.54
yes	male	71	52	3	3	1	4	no	no	no	no	no	right upper lobe of the lung	4	solid nodule	regular	no	no	yes	no	no	no	yes	yes	yes	yes	adenocarcinoma	77.811	3.49
no	male	58	28	1	3	0	3	no	no	no	no	no	left upper lobe of the lung	3	solid nodule	regular	no	no	yes	yes	yes	no	yes	yes	no	yes	adenocarcinoma	145	5.02
yes	male	85	40	2	3	0	3	no	no	no	no	yes	right lower lobe of the lung	4	solid nodule	regular	no	no	yes	yes	no	no	yes	no	no	yes	adenocarcinoma	4.202	2.73
yes	male	76	23	1	0	1	4	no	no	no	no	no	left lower lobe of the lung	1	solid nodule	regular	no	no	yes	no	no	no	yes	no	no	no	adenocarcinoma	54.52	1.26
yes	male	69	31	2	1	1	4	no	no	yes	no	no	right lower lobe of the lung	1	solid nodule	regular	yes	no	yes	yes	yes	no	yes	yes	no	no	adenocarcinoma	72.048	2.83
no	male	53	115	4	3	1	4	no	no	no	no	yes	right upper lobe of the lung	4	solid nodule	regular	no	no	yes	no	yes	no	yes	yes	no	yes	adenocarcinoma	11.22	24.94
yes	male	59	49	2	1	0	2	no	no	yes	no	yes	right middle lobe of the lung	1	solid nodule	regular	no	no	yes	yes	yes	no	yes	yes	no	no	adenocarcinoma	11.27	1.8
yes	male	78	49	2	1	0	2	no	yes	yes	no	no	left upper lobe of the lung	2	solid nodule	regular	no	no	yes	yes	yes	yes	yes	yes	no	yes	adenocarcinoma	2.06	28.5
yes	female	61	19	1	1	1	4	no	no	no	no	no	right upper lobe of the lung	2	solid nodule	regular	no	no	yes	no	yes	no	yes	no	no	no	adenocarcinoma	36.09	3.73
no	female	49	29	1	1	0	2	no	no	no	no	no	right upper lobe of the lung	2	solid nodule	irregular	no	no	no	no	no	no	no	no	no	no	adenocarcinoma	130.634	8.46
no	male	91	16	1	2	1	4	no	no	yes	yes	yes	right middle lobe of the lung	1	solid nodule	regular	no	no	yes	no	yes	no	yes	yes	no	yes	Non-small cell lung cancer other than adenocarcinoma	5.4	3.59
yes	male	67	25	1	0	0	1	no	no	no	no	no	right lower lobe of the lung	2	solid nodule	regular	no	yes	yes	no	yes	no	yes	no	no	no	adenocarcinoma	4.395	1.32
yes	female	55	39	2	3	0	3	no	yes	no	no	no	right upper lobe of the lung	1	solid nodule	regular	no	no	yes	yes	yes	no	yes	no	no	yes	adenocarcinoma	11.786	7.1
no	male	51	49	2	2	0	3	no	no	yes	yes	yes	right upper lobe of the lung	2	solid nodule	regular	no	no	yes	no	no	no	yes	yes	no	yes	adenocarcinoma	26.01	4.54
no	female	66	53	3	2	0	3	no	no	no	no	no	right lower lobe of the lung	1	solid nodule	regular	yes	no	yes	no	no	no	yes	no	no	no	adenocarcinoma	0.93	7.35
yes	female	73	11	1	0	0	1	no	no	no	no	no	right middle lobe of the lung	4	ground-glass nodule	regular	no	no	no	no	no	no	yes	no	no	no	adenocarcinoma	0.79	1.47
no	male	68	41	2	1	1	4	no	no	yes	yes	no	right upper lobe of the lung	1	solid nodule	regular	no	no	yes	no	yes	no	yes	yes	no	no	adenocarcinoma	873.8	15.96
yes	female	43	28	1	3	1	4	no	yes	no	no	no	left lower lobe of the lung	4	solid nodule	regular	no	yes	yes	yes	yes	no	yes	no	no	yes	adenocarcinoma	13.62	3.62
yes	male	64	32	2	2	1	4	no	no	yes	no	no	right upper lobe of the lung	1	solid nodule	regular	no	no	yes	no	yes	no	yes	no	no	yes	adenocarcinoma	1	1.91
no	female	58	13	1	3	1	4	no	no	no	no	no	right upper lobe of the lung	4	solid nodule	regular	no	no	yes	yes	yes	no	yes	no	no	yes	adenocarcinoma	4.08	34.16
yes	male	52	75	4	3	1	4	no	no	yes	no	no	right lower lobe of the lung	2	solid nodule	regular	yes	no	no	no	no	no	yes	no	no	yes	adenocarcinoma	17.321	30.34
yes	female	71	3	1	3	1	4	no	no	no	no	no	right upper lobe of the lung	4	solid nodule	regular	no	no	no	no	no	no	yes	no	no	no	adenocarcinoma	26.83	3.23
no	male	66	50	2	3	1	4	no	no	yes	yes	no	right upper lobe of the lung	4	solid nodule	regular	no	no	no	yes	no	no	yes	no	no	yes	adenocarcinoma	8.04	14.17
yes	female	67	37	2	1	1	4	no	no	no	no	no	left upper lobe of the lung	1	solid nodule	regular	no	no	no	no	yes	no	yes	yes	no	no	adenocarcinoma	10.91	2.66
no	female	54	72	4	2	1	4	yes	yes	no	no	no	right upper lobe of the lung	2	solid nodule	regular	no	no	no	yes	no	no	yes	no	no	no	Non-small cell lung cancer other than adenocarcinoma	1.06	80.1
no	male	67	64	3	2	0	3	no	no	no	no	no	left upper lobe of the lung	1	solid nodule	regular	no	no	no	yes	yes	no	yes	no	no	yes	Non-small cell lung cancer other than adenocarcinoma	2.127	18.09
yes	female	67	31	2	3	1	4	no	yes	no	no	no	right lower lobe of the lung	1	solid nodule	regular	no	no	yes	no	yes	no	yes	no	no	yes	adenocarcinoma	1.87	4.51
no	female	35	49	2	3	1	4	no	no	no	no	no	right lower lobe of the lung	4	solid nodule	regular	no	no	yes	no	no	no	yes	yes	yes	yes	adenocarcinoma	25.11	14.32
yes	female	63	36	2	3	1	4	no	no	no	no	no	right upper lobe of the lung	4	solid nodule	regular	no	no	yes	yes	yes	no	yes	yes	yes	yes	adenocarcinoma	17.094	0.5
yes	female	54	55	3	2	1	4	no	no	no	no	no	right upper lobe of the lung	1	solid nodule	regular	no	no	no	yes	yes	no	yes	yes	no	yes	adenocarcinoma	3.16	1.86
yes	female	65	39	2	2	1	4	yes	no	no	no	no	left upper lobe of the lung	4	solid nodule	regular	no	no	yes	yes	yes	no	yes	yes	no	yes	adenocarcinoma	4.13	4.42
no	male	80	74	4	0	1	4	no	no	no	no	no	right lower lobe of the lung	4	solid nodule	regular	no	no	yes	yes	no	no	yes	no	no	no	adenocarcinoma	9.08	38.4
no	female	70	29	1	0	0	1	no	no	no	no	no	left upper lobe of the lung	1	solid nodule	regular	no	no	yes	yes	yes	no	yes	yes	no	no	adenocarcinoma	21.96	4.54
yes	female	55	18	1	1	0	2	no	yes	no	no	no	left upper lobe of the lung	2	solid nodule	regular	no	no	yes	no	yes	no	yes	no	no	no	adenocarcinoma	1.71	5.09
no	female	66	69	3	3	1	4	no	no	no	no	no	right lower lobe of the lung	1	solid nodule	regular	no	no	yes	no	no	no	yes	yes	yes	yes	adenocarcinoma	715.1	5.33
yes	male	53	33	2	1	1	4	no	no	yes	no	no	left lower lobe of the lung	1	solid nodule	regular	no	no	yes	yes	yes	no	yes	no	no	no	adenocarcinoma	185.41	8.25
yes	female	48	10	1	0	0	1	no	no	no	no	no	right middle lobe of the lung	1	solid nodule	regular	no	no	yes	yes	yes	no	yes	no	no	no	adenocarcinoma	3.78	7.77
no	female	36	45	2	1	1	4	no	no	no	no	no	left upper lobe of the lung	4	solid nodule	regular	no	no	no	yes	yes	no	yes	no	no	no	adenocarcinoma	0.56	5.98
no	female	65	60	3	3	0	3	no	no	no	no	no	right lower lobe of the lung	1	solid nodule	regular	no	no	yes	yes	yes	no	yes	yes	no	no	adenocarcinoma	87.32	6.49
no	male	66	65	3	3	0	3	no	yes	no	no	yes	right upper lobe of the lung	2	solid nodule	regular	no	no	yes	no	yes	no	yes	yes	no	yes	adenocarcinoma	4	1.61
no	female	64	26	1	0	1	4	no	no	no	no	no	left lower lobe of the lung	4	subsolid nodule	regular	no	yes	no	yes	yes	no	yes	no	no	no	adenocarcinoma	3.32	2.18
yes	female	48	49	2	1	1	4	no	no	no	no	no	left lower lobe of the lung	1	solid nodule	regular	no	no	no	yes	yes	no	yes	no	no	no	adenocarcinoma	47.41	6.69
no	male	69	50	2	0	1	4	no	no	yes	no	yes	left upper lobe of the lung	4	subsolid nodule	regular	no	yes	yes	no	yes	no	yes	yes	no	no	adenocarcinoma	219.73	2.8
yes	female	53	11	1	0	1	4	no	no	no	no	no	right upper lobe of the lung	2	solid nodule	irregular	no	no	no	no	no	no	no	no	yes	yes	adenocarcinoma	218.96	1.6
yes	female	64	31	2	1	1	4	no	no	no	no	no	left upper lobe of the lung	4	solid nodule	regular	yes	no	yes	yes	yes	no	yes	yes	no	no	adenocarcinoma	52.72	2.51
no	male	62	16.2	1	2	1	4	no	no	yes	no	yes	left lower lobe of the lung	4	solid nodule	regular	no	no	no	no	no	no	no	no	no	yes	Non-small cell lung cancer other than adenocarcinoma	3.69	7.58
yes	female	51	26	1	0	0	1	yes	yes	no	no	no	right lower lobe of the lung	1	solid nodule	regular	no	no	no	yes	no	no	yes	yes	no	no	adenocarcinoma	1.29	1.39
yes	male	61	25	1	2	0	3	no	no	yes	no	no	left lower lobe of the lung	1	ground-glass nodule	regular	no	no	no	no	yes	no	yes	yes	no	no	adenocarcinoma	6.33	1.5
no	male	78	36	2	3	1	4	no	no	yes	no	no	right upper lobe of the lung	2	solid nodule	regular	no	no	yes	yes	no	no	yes	no	no	yes	Non-small cell lung cancer other than adenocarcinoma	2.85	4.81
yes	male	47	66	3	2	1	4	no	no	no	no	no	right upper lobe of the lung	4	solid nodule	regular	no	no	yes	yes	yes	yes	yes	yes	no	yes	adenocarcinoma	18.26	14.96
yes	female	54	20	1	3	0	3	no	no	no	no	no	right lower lobe of the lung	1	solid nodule	regular	no	no	yes	yes	yes	no	yes	yes	no	no	adenocarcinoma	14.82	2.89
yes	female	32	59	3	2	1	4	no	no	no	no	no	right lower lobe of the lung	2	solid nodule	regular	no	no	no	no	no	no	yes	no	no	yes	Non-small cell lung cancer other than adenocarcinoma	0.27	0.64
no	male	51	40	2	2	0	3	no	no	no	yes	no	right upper lobe of the lung	1	solid nodule	regular	no	no	yes	yes	no	no	no	no	yes	yes	Non-small cell lung cancer other than adenocarcinoma	1.72	4.27
no	male	44	62	3	3	1	4	no	no	yes	no	no	left lower lobe of the lung	4	solid nodule	irregular	no	yes	no	no	no	no	no	no	yes	yes	adenocarcinoma	986.2	231.9
yes	female	56	35	2	1	1	4	no	no	no	no	no	right upper lobe of the lung	1	solid nodule	regular	no	no	no	no	no	no	no	no	yes	no	adenocarcinoma	62.67	2.51
no	male	62	15	1	3	0	3	no	no	yes	no	yes	left upper lobe of the lung	4	solid nodule	regular	no	no	yes	no	no	no	no	no	no	no	adenocarcinoma	16.147	7.63
yes	female	58	7.3	1	0	1	4	no	no	no	no	no	left upper lobe of the lung	4	subsolid nodule	regular	no	yes	no	no	no	no	no	no	no	no	adenocarcinoma	2.96	0.73
yes	female	68	39	2	2	1	4	no	no	no	no	no	right middle lobe of the lung	2	solid nodule	irregular	no	no	yes	no	yes	no	no	no	yes	no	adenocarcinoma	5.778	0.75
yes	female	79	50	2	1	1	4	no	yes	no	no	no	right upper lobe of the lung	4	solid nodule	irregular	no	no	yes	no	no	no	no	yes	yes	yes	adenocarcinoma	1344	7.31
yes	male	69	47	2	3	1	4	no	no	no	no	no	right lower lobe of the lung	2	solid nodule	irregular	no	yes	yes	yes	no	no	no	no	yes	no	adenocarcinoma	472	7.01
yes	male	41	52	3	1	1	4	no	yes	yes	yes	no	left upper lobe of the lung	4	solid nodule	irregular	no	no	no	no	no	no	no	no	no	no	adenocarcinoma	2.09	1.36
yes	male	53	27	1	1	1	4	yes	no	yes	yes	no	right upper lobe of the lung	1	solid nodule	irregular	yes	no	yes	yes	yes	no	no	no	no	no	adenocarcinoma	54.5	5.2
yes	male	66	51	3	3	1	4	no	no	yes	no	yes	left upper lobe of the lung	1	solid nodule	irregular	yes	no	yes	no	no	no	no	no	no	yes	adenocarcinoma	16.603	1.92
no	male	70	45	2	3	1	4	no	no	yes	no	no	left lower lobe of the lung	1	solid nodule	irregular	yes	no	yes	yes	no	no	no	no	yes	yes	Non-small cell lung cancer other than adenocarcinoma	4.31	8.69
yes	female	61	23	1	0	0	1	no	no	no	no	no	right upper lobe of the lung	1	ground-glass nodule	irregular	yes	no	no	yes	no	no	no	no	no	no	adenocarcinoma	0.35	7.5
yes	female	53	13	1	0	0	1	no	no	no	no	no	left lower lobe of the lung	1	solid nodule	regular	no	no	no	no	yes	no	no	no	no	no	adenocarcinoma	2.807	1.15
yes	male	62	48	2	3	0	3	no	no	no	yes	no	right lower lobe of the lung	1	solid nodule	regular	yes	no	no	yes	yes	no	yes	no	no	yes	adenocarcinoma	292.5	10.43
no	male	65	73	4	3	1	4	no	yes	no	no	no	right upper lobe of the lung	1	solid nodule	irregular	yes	no	no	no	no	no	no	no	yes	no	Non-small cell lung cancer other than adenocarcinoma	5.68	5.45
yes	female	68	29	1	3	1	4	no	no	no	no	yes	left upper lobe of the lung	2	solid nodule	irregular	no	no	yes	yes	yes	no	yes	no	yes	yes	Non-small cell lung cancer other than adenocarcinoma	6.006	7.05
no	male	50	24	1	1	0	2	no	no	yes	no	no	left upper lobe of the lung	1	solid nodule	irregular	no	no	yes	yes	yes	no	no	no	no	yes	Non-small cell lung cancer other than adenocarcinoma	0.67	1.29
yes	male	65	27	1	1	1	4	no	no	no	no	no	right lower lobe of the lung	4	ground-glass nodule	irregular	yes	yes	no	yes	no	no	no	no	no	no	adenocarcinoma	0.365	3.08
no	female	78	47	2	2	0	3	no	no	no	no	no	right lower lobe of the lung	2	solid nodule	regular	yes	no	yes	no	no	no	no	no	yes	yes	adenocarcinoma	0.77	2.23
yes	male	49	62	3	3	1	4	yes	no	yes	yes	no	left upper lobe of the lung	4	solid nodule	regular	yes	yes	yes	yes	yes	no	yes	yes	yes	yes	adenocarcinoma	30.69	25.89
yes	female	74	54	3	3	1	4	no	no	no	no	no	left upper lobe of the lung	2	solid nodule	regular	yes	yes	no	yes	yes	no	yes	yes	yes	yes	adenocarcinoma	19.06	3.71
yes	female	37	28	1	2	1	4	no	no	no	no	no	right upper lobe of the lung	4	solid nodule	regular	yes	no	yes	no	no	no	no	no	yes	yes	adenocarcinoma	4.46	2.83
yes	female	69	57	3	3	1	4	no	yes	no	no	yes	left lower lobe of the lung	4	solid nodule	regular	yes	yes	yes	yes	yes	no	yes	no	no	yes	adenocarcinoma	2.98	4.63
yes	female	55	15	1	0	0	1	yes	no	no	no	no	right upper lobe of the lung	1	solid nodule	regular	no	no	yes	yes	no	no	yes	no	no	no	adenocarcinoma	1.91	5.82
yes	female	63	82	4	1	0	3	no	no	no	no	no	right upper lobe of the lung	1	solid nodule	regular	no	no	yes	yes	no	no	yes	yes	yes	yes	adenocarcinoma	6.92	6.49
yes	female	56	39	2	1	1	4	no	no	no	no	no	right lower lobe of the lung	1	solid nodule	regular	no	no	yes	yes	no	no	yes	yes	yes	no	Non-small cell lung cancer other than adenocarcinoma	27.03	1.38
yes	male	61	29	1	1	0	2	no	no	no	no	no	left lower lobe of the lung	1	solid nodule	regular	no	no	no	no	no	no	yes	no	yes	no	adenocarcinoma	7.876	2.97
no	male	55	32	2	3	1	4	no	no	yes	no	yes	right upper lobe of the lung	4	solid nodule	regular	no	no	yes	yes	no	no	yes	no	no	yes	adenocarcinoma	2.62	11.1
no	male	68	40	2	3	1	4	no	no	yes	yes	yes	right lower lobe of the lung	2	solid nodule	regular	no	no	yes	yes	yes	no	yes	no	yes	no	Non-small cell lung cancer other than adenocarcinoma	34.4	6.9
yes	female	56	23	1	3	1	4	no	no	no	no	no	right lower lobe of the lung	1	solid nodule	regular	no	no	yes	yes	yes	no	no	no	no	no	adenocarcinoma	44.325	1.05
yes	female	70	29	1	2	1	4	yes	no	no	no	yes	right upper lobe of the lung	4	solid nodule	regular	yes	yes	yes	yes	no	no	yes	yes	yes	yes	adenocarcinoma	20.13	5.12
yes	female	76	24	1	1	1	4	no	no	no	no	no	left upper lobe of the lung	2	solid nodule	regular	no	no	no	no	yes	no	yes	no	yes	yes	adenocarcinoma	5.5	3.18
yes	female	69	25	1	0	1	4	no	no	no	no	no	left lower lobe of the lung	1	solid nodule	regular	yes	no	yes	no	yes	no	yes	no	yes	no	adenocarcinoma	105.979	3.1
yes	male	62	72	4	3	1	4	no	no	yes	yes	yes	left lower lobe of the lung	4	solid nodule	regular	yes	no	yes	yes	yes	no	yes	no	yes	yes	Non-small cell lung cancer other than adenocarcinoma	22.59	1.76
no	male	79	67	3	3	0	3	no	no	yes	yes	no	right upper lobe of the lung	1	solid nodule	regular	yes	no	yes	yes	no	no	yes	no	yes	yes	Non-small cell lung cancer other than adenocarcinoma	4.3	11.71
yes	female	63	34	2	3	1	4	no	yes	no	no	yes	right lower lobe of the lung	1	solid nodule	regular	no	no	yes	yes	no	no	yes	no	no	yes	adenocarcinoma	2.42	0.83
yes	female	59	16	1	1	1	4	no	no	no	no	no	left upper lobe of the lung	1	solid nodule	regular	yes	no	yes	yes	no	no	no	no	yes	yes	adenocarcinoma	5.48	1.2
yes	female	48	37	2	3	1	4	no	no	no	no	no	right upper lobe of the lung	1	solid nodule	regular	yes	no	yes	yes	yes	no	yes	no	yes	yes	adenocarcinoma	26.884	15
no	male	69	33	2	3	1	4	no	no	yes	no	yes	right lower lobe of the lung	1	solid nodule	regular	yes	no	yes	yes	yes	no	yes	no	yes	yes	Non-small cell lung cancer other than adenocarcinoma	676.021	21.5
no	female	52	21	1	0	1	4	no	no	no	no	no	right middle lobe of the lung	4	solid nodule	regular	no	no	yes	yes	no	no	yes	no	yes	yes	adenocarcinoma	2.49	2.92
yes	male	63	19	1	3	1	4	no	no	no	no	no	right lower lobe of the lung	4	solid nodule	regular	no	no	no	no	no	no	no	no	yes	yes	adenocarcinoma	5.45	3.69
no	male	65	20	1	0	0	1	yes	no	yes	yes	yes	left upper lobe of the lung	2	solid nodule	regular	no	no	yes	yes	yes	no	no	no	no	no	adenocarcinoma	4.54	1.68
yes	female	49	49	2	1	0	2	no	yes	no	no	no	left upper lobe of the lung	4	solid nodule	regular	no	no	yes	no	no	no	yes	no	yes	no	adenocarcinoma	12.02	2.63
yes	female	92	58	3	3	1	4	no	no	no	no	yes	right upper lobe of the lung	4	solid nodule	regular	no	no	yes	yes	yes	no	yes	no	yes	yes	adenocarcinoma	221.8	7.09
yes	male	62	31	2	1	0	2	no	no	yes	no	yes	left upper lobe of the lung	1	solid nodule	regular	yes	no	no	yes	no	no	yes	yes	yes	no	Non-small cell lung cancer other than adenocarcinoma	7.98	8.27
no	female	76	48	2	3	0	3	no	no	no	no	no	left upper lobe of the lung	4	solid nodule	regular	yes	no	yes	yes	yes	no	yes	no	yes	yes	adenocarcinoma	26.491	2.85
no	female	74	45	2	2	1	4	no	no	no	no	no	right middle lobe of the lung	2	solid nodule	regular	yes	no	yes	yes	yes	no	yes	no	no	yes	adenocarcinoma	74.02	2.64
no	male	66	32	2	3	0	3	yes	no	yes	yes	yes	left upper lobe of the lung	1	solid nodule	regular	yes	no	yes	yes	yes	yes	yes	no	no	yes	adenocarcinoma	4.81	4.05
yes	male	64	44	2	3	1	4	no	no	yes	yes	yes	left lower lobe of the lung	4	solid nodule	regular	yes	yes	yes	yes	yes	yes	yes	yes	yes	yes	Non-small cell lung cancer other than adenocarcinoma	26.11	11.82
yes	female	44	15	1	1	1	4	no	no	no	no	no	left upper lobe of the lung	1	solid nodule	regular	no	no	yes	yes	yes	no	yes	no	yes	no	adenocarcinoma	82.87	3.54
yes	male	59	31	2	3	0	3	no	no	yes	yes	no	right middle lobe of the lung	1	solid nodule	regular	no	no	yes	yes	yes	no	yes	no	no	no	adenocarcinoma	1.61	1.73
yes	female	38	32	2	2	1	4	no	no	no	no	no	right upper lobe of the lung	1	solid nodule	regular	no	no	yes	yes	no	no	yes	yes	yes	yes	adenocarcinoma	20.04	5.9
yes	female	55	14	1	3	0	3	no	no	no	no	yes	right upper lobe of the lung	4	solid nodule	regular	no	no	no	yes	no	no	yes	no	no	yes	adenocarcinoma	66.22	9.11
no	male	64	45	2	1	0	2	no	no	yes	yes	yes	left upper lobe of the lung	1	solid nodule	regular	no	no	yes	yes	yes	no	yes	no	yes	yes	adenocarcinoma	20.075	2.01
yes	female	68	35	2	2	0	3	no	no	no	no	no	left lower lobe of the lung	1	solid nodule	regular	yes	no	yes	yes	yes	no	yes	no	no	no	adenocarcinoma	34.63	1.92
yes	male	68	23	1	0	0	1	no	no	yes	no	yes	right upper lobe of the lung	2	solid nodule	regular	yes	no	yes	yes	yes	yes	yes	yes	no	yes	adenocarcinoma	5.11	1.64
yes	female	51	15	1	0	0	1	no	yes	no	no	no	right upper lobe of the lung	4	ground-glass nodule	irregular	no	no	no	no	no	no	no	no	no	no	adenocarcinoma	2.96	1.13
no	male	69	90	4	3	1	4	no	no	no	no	no	right upper lobe of the lung	4	solid nodule	regular	yes	no	yes	yes	yes	no	yes	yes	yes	yes	Non-small cell lung cancer other than adenocarcinoma	16.81	8.26
yes	female	62	31	2	1	1	4	no	no	no	no	no	left upper lobe of the lung	4	solid nodule	regular	yes	no	no	yes	no	no	yes	yes	yes	no	adenocarcinoma	7.08	4.23
yes	female	34	19	1	1	1	4	no	no	no	no	no	right upper lobe of the lung	2	solid nodule	regular	no	no	no	no	yes	no	no	no	no	yes	adenocarcinoma	182.2	1.98
no	male	54	66	3	1	1	4	no	no	yes	no	yes	left lower lobe of the lung	1	solid nodule	regular	yes	no	yes	yes	yes	no	yes	yes	yes	no	Non-small cell lung cancer other than adenocarcinoma	0.81	1.36
yes	female	67	25	1	0	1	4	yes	no	no	no	yes	left upper lobe of the lung	4	solid nodule	regular	no	yes	yes	yes	yes	no	yes	no	yes	yes	adenocarcinoma	4.55	1.44
yes	male	59	19	1	2	1	4	no	no	yes	no	no	right upper lobe of the lung	1	solid nodule	regular	yes	no	yes	yes	no	no	yes	yes	yes	yes	adenocarcinoma	13.83	1.78
yes	male	41	34	2	3	1	4	no	no	no	no	no	right upper lobe of the lung	4	solid nodule	regular	no	no	no	yes	yes	no	yes	no	yes	yes	adenocarcinoma	5.43	3.37
yes	female	56	16	1	3	1	4	no	no	no	no	no	right upper lobe of the lung	4	solid nodule	regular	no	no	no	yes	yes	no	yes	no	no	yes	adenocarcinoma	74.84	19.81
yes	female	52	14	1	0	0	1	no	yes	no	no	no	right lower lobe of the lung	2	solid nodule	irregular	no	no	no	no	yes	no	no	no	no	yes	adenocarcinoma	43.54	4.28
yes	female	70	18	1	0	0	1	no	no	no	no	no	left upper lobe of the lung	1	ground-glass nodule	irregular	yes	no	yes	no	yes	no	yes	no	no	no	adenocarcinoma	2.19	2.45
yes	male	42	30	1	0	0	1	no	no	no	no	no	right upper lobe of the lung	1	solid nodule	regular	no	no	yes	yes	yes	no	yes	no	no	no	adenocarcinoma	0.59	2.33
no	male	82	68	3	3	1	4	no	no	yes	no	no	right upper lobe of the lung	1	solid nodule	regular	no	no	yes	yes	yes	no	yes	no	no	yes	Non-small cell lung cancer other than adenocarcinoma	51.9	34.78
yes	male	71	16	1	3	0	3	yes	no	no	no	no	right upper lobe of the lung	1	solid nodule	regular	no	no	no	yes	yes	yes	no	no	no	yes	adenocarcinoma	4.64	2.5
no	male	56	45	2	3	0	3	no	no	yes	yes	yes	right lower lobe of the lung	2	solid nodule	regular	yes	no	yes	yes	yes	no	yes	no	no	yes	adenocarcinoma	2.81	4.96
yes	male	68	26	1	3	1	4	no	no	yes	yes	yes	right upper lobe of the lung	1	solid nodule	regular	yes	no	no	yes	no	no	yes	no	no	yes	adenocarcinoma	48.33	9.59
yes	female	51	51	3	2	0	3	no	no	no	no	no	left upper lobe of the lung	2	solid nodule	regular	yes	no	yes	yes	yes	no	yes	yes	yes	yes	adenocarcinoma	4.495	3.77
no	male	71	38	2	0	0	1	no	no	no	no	yes	right upper lobe of the lung	1	solid nodule	regular	no	no	yes	yes	no	yes	yes	yes	yes	yes	Non-small cell lung cancer other than adenocarcinoma	1.563	2.77
yes	male	71	66	3	1	0	3	no	no	no	no	no	right upper lobe of the lung	1	solid nodule	regular	yes	no	yes	yes	yes	no	yes	yes	yes	no	adenocarcinoma	55.16	16.32
yes	female	63	37	2	1	1	4	no	no	no	no	no	left upper lobe of the lung	4	solid nodule	regular	yes	yes	no	yes	yes	no	yes	no	yes	yes	adenocarcinoma	0.92	2.84
yes	female	53	48	2	2	1	4	no	no	no	no	no	right upper lobe of the lung	1	solid nodule	regular	no	no	no	yes	yes	no	yes	no	yes	yes	Non-small cell lung cancer other than adenocarcinoma	3.77	3.6
yes	female	65	13	1	2	0	3	no	no	no	no	no	left upper lobe of the lung	1	solid nodule	regular	no	no	yes	yes	no	no	yes	no	yes	yes	adenocarcinoma	2.11	3.22
no	female	47	20	1	0	0	1	no	no	no	no	no	right lower lobe of the lung	1	solid nodule	regular	yes	yes	no	yes	no	no	yes	no	no	yes	adenocarcinoma	1.252	0.55
no	male	50	84	4	3	1	4	no	no	no	no	no	right upper lobe of the lung	3	solid nodule	regular	yes	yes	yes	yes	yes	no	yes	yes	yes	yes	adenocarcinoma	10.61	7.2
yes	female	39	14	1	3	1	4	no	no	no	no	no	right upper lobe of the lung	4	solid nodule	regular	no	no	no	yes	yes	no	no	no	no	yes	adenocarcinoma	340.9	24.92
no	male	54	43	2	2	1	4	yes	yes	yes	yes	no	right lower lobe of the lung	1	solid nodule	regular	no	no	yes	yes	yes	no	yes	yes	yes	yes	Non-small cell lung cancer other than adenocarcinoma	39.53	3.55
no	male	86	43	2	2	0	3	no	yes	yes	no	no	left lower lobe of the lung	4	solid nodule	regular	yes	yes	yes	yes	yes	no	yes	yes	yes	yes	adenocarcinoma	203	13.23
no	female	63	26	1	3	0	3	no	no	no	no	no	left upper lobe of the lung	4	solid nodule	regular	yes	no	yes	yes	yes	no	yes	no	no	yes	adenocarcinoma	0.98	2.22
no	female	74	46	2	3	1	4	no	no	no	no	no	right lower lobe of the lung	4	solid nodule	regular	yes	yes	yes	yes	yes	no	yes	no	yes	yes	adenocarcinoma	36.53	27.83
yes	male	61	28	1	0	1	4	no	no	yes	yes	no	right lower lobe of the lung	4	solid nodule	regular	no	no	no	yes	yes	no	yes	no	yes	no	adenocarcinoma	8.72	3.17
yes	female	71	20	1	0	0	1	no	no	no	no	no	left lower lobe of the lung	2	solid nodule	regular	no	no	yes	yes	yes	no	yes	no	no	no	adenocarcinoma	0.68	7.27
yes	female	61	12	1	0	0	1	no	no	no	no	yes	right upper lobe of the lung	2	solid nodule	regular	no	no	no	yes	yes	no	no	no	no	no	adenocarcinoma	0.61	2.33
no	male	49	73	4	3	1	4	no	no	yes	yes	yes	right lower lobe of the lung	4	solid nodule	regular	yes	yes	yes	yes	yes	no	yes	no	yes	yes	adenocarcinoma	14.33	20.95
no	male	62	13	1	1	0	2	no	no	no	no	no	right middle lobe of the lung	1	solid nodule	regular	no	no	yes	yes	yes	no	yes	no	no	no	adenocarcinoma	1.94	2.46
no	female	78	26	1	0	0	1	yes	no	no	no	no	right lower lobe of the lung	1	solid nodule	regular	yes	no	yes	no	yes	no	yes	no	yes	no	Non-small cell lung cancer other than adenocarcinoma	2.97	11.43
no	male	54	59	3	3	1	4	no	no	yes	yes	no	right lower lobe of the lung	4	solid nodule	regular	yes	yes	yes	yes	yes	no	yes	yes	yes	yes	adenocarcinoma	3.78	36.73
no	male	70	32	2	0	0	1	no	no	yes	yes	yes	right lower lobe of the lung	1	solid nodule	regular	no	no	no	yes	yes	no	yes	no	no	no	adenocarcinoma	39.71	2.06
yes	female	72	24	1	1	1	4	no	no	no	no	no	right upper lobe of the lung	1	solid nodule	regular	no	no	yes	yes	yes	no	yes	no	no	no	adenocarcinoma	6.67	2.78
yes	female	63	10	1	2	1	4	no	no	no	no	no	right upper lobe of the lung	4	solid nodule	regular	no	no	no	yes	no	no	no	no	yes	yes	adenocarcinoma	2.94	2.13
yes	male	48	29	1	2	1	4	no	no	yes	yes	no	right lower lobe of the lung	1	solid nodule	regular	yes	yes	yes	yes	no	no	yes	yes	yes	yes	adenocarcinoma	6.4	4.08
yes	female	57	19	1	0	0	1	no	no	no	no	no	right upper lobe of the lung	1	solid nodule	regular	no	no	yes	yes	yes	no	yes	no	no	yes	adenocarcinoma	3	1.8
yes	female	42	39	2	3	1	4	no	no	no	no	yes	right lower lobe of the lung	1	solid nodule	regular	no	yes	no	yes	yes	yes	yes	no	no	yes	adenocarcinoma	28.42	4.3
yes	male	65	40	2	2	1	4	yes	no	no	no	no	right upper lobe of the lung	1	solid nodule	regular	yes	yes	yes	yes	yes	no	yes	no	yes	yes	adenocarcinoma	1.66	1.82
yes	male	25	30	1	0	1	4	no	no	yes	no	no	right upper lobe of the lung	4	solid nodule	regular	yes	no	yes	yes	yes	no	yes	no	no	no	adenocarcinoma	15.14	9.11
no	female	53	62	3	3	1	4	no	no	no	no	no	left upper lobe of the lung	1	solid nodule	regular	no	no	yes	yes	yes	no	yes	no	yes	yes	Non-small cell lung cancer other than adenocarcinoma	26.76	5.07
yes	female	55	31	2	0	1	4	no	no	no	no	no	right lower lobe of the lung	4	solid nodule	regular	no	no	no	yes	yes	no	yes	no	no	no	adenocarcinoma	30.98	1.75
yes	female	72	38	2	3	1	4	no	no	no	no	no	right lower lobe of the lung	2	solid nodule	regular	no	no	no	yes	yes	no	yes	no	no	yes	adenocarcinoma	3.15	2.84
yes	female	67	14	1	3	0	3	no	no	no	no	no	right lower lobe of the lung	1	solid nodule	irregular	no	no	no	no	yes	no	yes	no	no	no	adenocarcinoma	3.62	2.22
no	male	66	55	3	1	1	4	no	no	yes	no	no	left upper lobe of the lung	4	solid nodule	regular	no	yes	yes	yes	yes	no	yes	no	yes	yes	adenocarcinoma	1.2	2.38
yes	female	68	43	2	1	1	4	no	no	no	no	no	right middle lobe of the lung	4	solid nodule	regular	yes	no	yes	yes	yes	no	yes	yes	no	no	adenocarcinoma	15.08	2.09
yes	female	62	18	1	0	0	1	no	no	no	no	no	right upper lobe of the lung	1	ground-glass nodule	regular	no	no	no	no	no	no	yes	no	no	no	adenocarcinoma	0.55	1.4
no	male	60	28	1	2	1	4	no	no	yes	no	no	right upper lobe of the lung	4	solid nodule	regular	no	no	no	yes	yes	no	yes	no	yes	no	adenocarcinoma	1.759	2.27
yes	female	70	21	1	2	1	4	no	no	no	no	yes	left upper lobe of the lung	4	solid nodule	regular	no	no	yes	yes	no	no	yes	no	yes	yes	adenocarcinoma	123.8	2.33
yes	female	54	18	1	1	1	4	yes	no	no	no	no	left upper lobe of the lung	1	solid nodule	regular	yes	no	yes	yes	yes	no	yes	no	yes	yes	adenocarcinoma	1.58	2.61
yes	female	57	22	1	3	1	4	yes	no	no	no	no	left lower lobe of the lung	4	solid nodule	regular	yes	no	yes	yes	yes	no	yes	no	no	yes	adenocarcinoma	8.62	2.46
yes	female	61	17	1	0	0	1	no	no	no	no	no	right lower lobe of the lung	1	solid nodule	regular	no	no	yes	yes	yes	no	yes	no	no	no	adenocarcinoma	2.98	2.06
yes	male	73	48	2	2	1	4	no	no	yes	no	yes	right upper lobe of the lung	1	solid nodule	regular	yes	no	yes	yes	yes	no	yes	no	no	yes	adenocarcinoma	236.4	26.3
yes	female	54	19	1	1	1	4	no	yes	no	no	yes	right upper lobe of the lung	4	solid nodule	regular	no	no	yes	yes	yes	no	yes	yes	yes	yes	adenocarcinoma	2.64	3.02
no	male	42	24	1	2	0	3	no	no	no	no	no	right upper lobe of the lung	1	solid nodule	regular	yes	no	yes	yes	yes	no	yes	yes	yes	yes	adenocarcinoma	1.39	1.7
yes	female	78	17	1	2	1	4	no	no	no	no	no	left lower lobe of the lung	4	solid nodule	regular	no	no	yes	yes	no	no	yes	no	yes	yes	adenocarcinoma	437.16	2.75
yes	male	64	36	2	2	1	4	no	yes	no	no	no	right middle lobe of the lung	4	solid nodule	regular	no	no	yes	yes	no	no	yes	no	yes	yes	adenocarcinoma	623.61	12.1
no	male	68	32	2	0	1	4	no	no	yes	yes	no	right lower lobe of the lung	1	solid nodule	regular	no	no	yes	yes	yes	no	yes	no	yes	no	Non-small cell lung cancer other than adenocarcinoma	1.75	2.84
no	male	64	36	2	3	0	3	no	no	yes	yes	no	right upper lobe of the lung	3	solid nodule	regular	yes	no	yes	yes	no	no	yes	no	yes	yes	adenocarcinoma	1.99	4.97
yes	male	49	19	1	1	1	4	no	no	no	no	no	right upper lobe of the lung	4	solid nodule	regular	no	no	yes	yes	yes	no	yes	no	no	no	adenocarcinoma	1.89	5.26
yes	female	66	67	3	3	1	4	no	no	no	no	no	left lower lobe of the lung	1	solid nodule	regular	yes	yes	yes	yes	yes	no	yes	yes	yes	yes	adenocarcinoma	121.1	4.99
no	male	61	20	1	2	1	4	yes	no	yes	no	yes	left upper lobe of the lung	2	solid nodule	regular	no	no	yes	no	yes	no	no	no	yes	no	adenocarcinoma	3.72	2.33
yes	female	64	12	1	0	0	1	no	yes	no	no	no	right lower lobe of the lung	1	solid nodule	regular	no	no	no	yes	yes	no	yes	no	no	no	adenocarcinoma	0.26	0.97
no	female	54	49	2	2	0	3	no	no	no	no	no	right lower lobe of the lung	2	solid nodule	regular	yes	yes	yes	yes	yes	no	yes	yes	yes	yes	adenocarcinoma	1.27	1.58
yes	female	62	26	1	0	0	1	no	no	no	no	no	right upper lobe of the lung	2	solid nodule	regular	no	no	yes	yes	yes	no	yes	no	no	no	adenocarcinoma	3.27	2.46
yes	male	76	30	2	2	1	4	no	no	yes	no	no	right upper lobe of the lung	1	solid nodule	regular	no	no	no	yes	yes	no	yes	no	no	yes	adenocarcinoma	139.1	6.87
yes	female	59	64	3	2	0	3	yes	no	no	no	no	left upper lobe of the lung	1	solid nodule	regular	no	no	yes	yes	yes	no	yes	yes	yes	yes	Non-small cell lung cancer other than adenocarcinoma	5.15	7.29
yes	male	73	31	2	3	1	4	no	no	yes	no	yes	left upper lobe of the lung	4	solid nodule	regular	yes	no	yes	yes	yes	no	yes	no	no	yes	adenocarcinoma	593.11	11.44
yes	female	69	18	2	0	0	1	yes	yes	no	no	no	right upper lobe of the lung	1	ground-glass nodule	regular	no	no	yes	yes	yes	no	yes	no	no	no	adenocarcinoma	4.02	1.74
no	male	49	38	2	3	1	4	yes	no	yes	yes	no	left upper lobe of the lung	4	solid nodule	regular	no	no	no	yes	yes	no	yes	no	yes	yes	adenocarcinoma	113.47	22.17
no	male	66	17	1	0	0	1	no	no	yes	yes	no	left upper lobe of the lung	1	solid nodule	regular	no	no	yes	yes	yes	no	yes	no	no	no	adenocarcinoma	3.15	1.45
yes	female	62	42	2	2	1	4	no	no	no	no	no	right lower lobe of the lung	1	solid nodule	regular	no	no	yes	yes	yes	no	yes	no	no	yes	adenocarcinoma	16.24	3.08
no	female	68	23	1	0	0	1	no	no	no	no	no	right upper lobe of the lung	1	ground-glass nodule	regular	no	no	no	yes	yes	no	yes	no	no	no	adenocarcinoma	1.96	3.2
yes	male	65	22	4	3	1	4	no	no	yes	no	no	right upper lobe of the lung	4	solid nodule	regular	no	no	yes	no	yes	no	yes	no	no	yes	adenocarcinoma	15.6	16.26
yes	female	49	28	1	0	1	4	no	no	no	no	no	right lower lobe of the lung	1	solid nodule	regular	no	no	yes	yes	yes	no	yes	no	no	yes	adenocarcinoma	7.56	3.74
yes	female	63	11	1	0	0	1	no	no	no	no	no	right upper lobe of the lung	1	ground-glass nodule	irregular	no	no	no	no	no	no	no	no	no	yes	adenocarcinoma	0.71	1.17
yes	female	52	34	2	3	1	4	yes	no	no	no	no	left lower lobe of the lung	4	solid nodule	regular	no	no	yes	yes	yes	no	yes	yes	yes	yes	adenocarcinoma	17.26	2.36
no	male	68	43	2	2	1	4	no	no	no	no	no	left upper lobe of the lung	1	solid nodule	regular	no	no	yes	yes	yes	no	yes	no	yes	yes	Non-small cell lung cancer other than adenocarcinoma	1.47	3.37
no	male	56	50	2	2	1	4	no	no	no	no	yes	right upper lobe of the lung	4	solid nodule	regular	no	no	yes	yes	no	no	yes	yes	yes	yes	adenocarcinoma	528.1	11.14
no	male	69	48	2	3	1	4	yes	no	yes	yes	no	left lower lobe of the lung	2	solid nodule	regular	no	no	yes	yes	yes	no	yes	yes	yes	no	adenocarcinoma	12.13	14.73
no	male	72	41	2	1	1	4	no	no	yes	yes	yes	left lower lobe of the lung	1	solid nodule	regular	yes	no	yes	yes	yes	no	yes	no	no	no	Non-small cell lung cancer other than adenocarcinoma	1.19	11.71
yes	female	66	28	1	3	1	4	yes	no	no	no	no	left lower lobe of the lung	4	solid nodule	regular	no	yes	yes	yes	yes	no	yes	no	yes	yes	adenocarcinoma	17.29	2.73
yes	female	57	19	1	2	1	4	no	yes	no	no	no	right lower lobe of the lung	2	solid nodule	regular	no	no	no	yes	yes	no	yes	no	no	yes	adenocarcinoma	2.67	3.27
yes	female	61	28	1	0	0	1	yes	no	no	no	no	left lower lobe of the lung	1	ground-glass nodule	regular	no	no	no	yes	yes	no	yes	no	no	no	adenocarcinoma	1.31	1.98
yes	female	44	12	1	0	1	4	no	no	no	no	no	left lower lobe of the lung	4	solid nodule	regular	no	no	no	yes	yes	no	yes	no	yes	no	Non-small cell lung cancer other than adenocarcinoma	0.89	1.24
no	female	49	34	3	0	0	2	no	no	no	no	no	right lower lobe of the lung	1	solid nodule	regular	yes	yes	yes	yes	yes	no	yes	no	no	no	adenocarcinoma	3.37	1.66
yes	female	73	25	1	2	0	3	no	no	no	no	no	right upper lobe of the lung	1	solid nodule	regular	no	no	yes	yes	no	no	yes	no	yes	yes	adenocarcinoma	10.19	2.88
yes	female	63	14	1	0	0	1	yes	no	no	no	no	right middle lobe of the lung	1	solid nodule	regular	no	no	yes	yes	no	no	yes	no	yes	no	adenocarcinoma	3.75	1.29
yes	female	75	57	3	1	0	3	yes	no	no	no	no	right lower lobe of the lung	1	solid nodule	regular	yes	no	yes	yes	yes	no	yes	no	yes	no	adenocarcinoma	1.39	2.85
yes	female	55	32	2	0	1	4	no	yes	no	no	yes	right upper lobe of the lung	1	solid nodule	regular	no	no	yes	yes	yes	no	yes	yes	yes	no	adenocarcinoma	0.36	1.53
yes	male	62	40	2	2	0	3	no	no	yes	yes	yes	right lower lobe of the lung	1	solid nodule	regular	yes	no	yes	yes	yes	no	yes	no	no	yes	adenocarcinoma	13.71	1.97
no	female	63	20	1	1	0	2	no	no	no	no	no	right upper lobe of the lung	1	solid nodule	regular	no	no	yes	yes	yes	no	yes	no	no	yes	Non-small cell lung cancer other than adenocarcinoma	2.8	2.52
yes	male	72	57	3	0	1	4	no	no	no	no	yes	right upper lobe of the lung	1	solid nodule	regular	yes	yes	yes	yes	yes	no	yes	no	no	no	Non-small cell lung cancer other than adenocarcinoma	3.3	4.1
no	male	63	80	4	3	1	4	no	no	yes	no	no	left upper lobe of the lung	3	solid nodule	regular	no	yes	yes	yes	yes	no	yes	yes	yes	yes	adenocarcinoma	2.02	5.95
yes	male	52	36	2	2	1	4	no	yes	yes	yes	no	right middle lobe of the lung	4	solid nodule	regular	no	no	yes	yes	yes	no	yes	yes	yes	yes	adenocarcinoma	134.5	2.42
yes	female	72	37	2	1	0	2	no	no	no	no	yes	left upper lobe of the lung	2	solid nodule	regular	no	yes	yes	yes	yes	no	yes	yes	yes	no	adenocarcinoma	21.57	5
yes	female	59	26	1	3	1	4	no	no	no	no	no	left upper lobe of the lung	1	solid nodule	regular	no	no	no	yes	yes	no	yes	no	no	yes	adenocarcinoma	53.57	1.51
yes	female	64	76	4	3	1	4	yes	no	no	no	no	right upper lobe of the lung	4	solid nodule	regular	no	no	yes	yes	yes	no	yes	yes	yes	yes	adenocarcinoma	7.87	6.65
no	female	45	40	2	3	1	4	yes	no	no	no	no	right lower lobe of the lung	4	solid nodule	regular	no	no	yes	yes	yes	no	yes	no	no	yes	adenocarcinoma	12.56	2.35
yes	male	55	20	1	0	1	4	no	no	no	no	no	left upper lobe of the lung	2	solid nodule	regular	no	no	yes	yes	yes	no	yes	no	yes	no	adenocarcinoma	33.74	3.62
no	female	52	47	2	1	1	4	yes	no	no	no	no	left upper lobe of the lung	1	solid nodule	regular	no	no	yes	yes	no	yes	yes	yes	yes	yes	adenocarcinoma	40.58	1.24
no	male	51	13	1	3	0	3	no	no	yes	yes	yes	left upper lobe of the lung	3	solid nodule	regular	yes	no	yes	yes	yes	no	no	no	no	no	adenocarcinoma	3.85	3.81
no	female	76	46	2	1	1	4	no	yes	no	no	no	left upper lobe of the lung	1	solid nodule	regular	no	no	yes	yes	yes	no	yes	yes	yes	yes	Non-small cell lung cancer other than adenocarcinoma	1.66	2.1
yes	male	56	11	1	0	0	1	no	yes	no	no	no	left upper lobe of the lung	1	solid nodule	regular	no	no	yes	yes	yes	no	yes	no	no	no	adenocarcinoma	1.95	1.31
yes	male	61	40	2	2	1	4	no	no	no	no	no	right lower lobe of the lung	1	solid nodule	regular	no	no	yes	yes	no	no	yes	yes	yes	yes	adenocarcinoma	110.5	11.56
yes	female	67	36	2	3	0	3	no	no	no	no	no	left upper lobe of the lung	1	solid nodule	regular	no	no	yes	yes	yes	no	yes	no	yes	yes	adenocarcinoma	111.6	4.96
no	female	54	17	1	0	0	1	no	yes	no	no	no	right middle lobe of the lung	1	solid nodule	regular	no	no	yes	yes	yes	yes	yes	no	yes	no	adenocarcinoma	1.87	1.27
no	male	46	28	1	3	1	4	no	no	yes	yes	no	left upper lobe of the lung	4	solid nodule	regular	no	no	yes	yes	yes	no	yes	no	no	yes	Non-small cell lung cancer other than adenocarcinoma	3.12	2.62
yes	female	39	25	1	3	0	3	no	no	no	no	no	left upper lobe of the lung	1	solid nodule	regular	yes	yes	yes	yes	no	no	yes	no	no	yes	adenocarcinoma	11.303	2.23
no	male	49	41	2	3	1	4	yes	no	yes	yes	yes	right lower lobe of the lung	1	solid nodule	regular	no	yes	yes	yes	no	no	yes	yes	yes	yes	Non-small cell lung cancer other than adenocarcinoma	3.22	12.97
yes	female	64	58	3	3	0	3	no	no	no	no	no	right lower lobe of the lung	4	solid nodule	regular	yes	no	yes	yes	yes	no	yes	yes	no	yes	adenocarcinoma	29.13	2.43
no	male	76	33	2	3	1	4	no	no	yes	no	yes	right upper lobe of the lung	4	solid nodule	regular	yes	yes	yes	yes	yes	no	yes	no	yes	yes	Non-small cell lung cancer other than adenocarcinoma	3	15.81
yes	female	68	20	1	0	0	1	no	no	no	no	no	left lower lobe of the lung	1	solid nodule	irregular	no	no	no	no	no	no	yes	no	no	no	adenocarcinoma	2.02	2.34
no	male	67	31	2	3	0	3	yes	no	no	no	yes	right lower lobe of the lung	1	solid nodule	regular	yes	no	yes	yes	yes	no	yes	no	no	yes	Non-small cell lung cancer other than adenocarcinoma	10.85	4.29
yes	male	56	14	1	3	0	3	no	yes	no	no	no	right upper lobe of the lung	3	solid nodule	regular	yes	no	yes	yes	yes	no	yes	no	no	yes	adenocarcinoma	41.99	1.64
no	male	60	61	3	0	0	2	no	no	yes	yes	yes	right lower lobe of the lung	2	solid nodule	regular	yes	no	yes	yes	yes	no	yes	no	yes	no	Non-small cell lung cancer other than adenocarcinoma	4.03	14.32
yes	male	52	27	1	3	1	4	no	no	yes	no	no	left lower lobe of the lung	1	solid nodule	regular	no	no	yes	yes	yes	no	yes	no	no	yes	adenocarcinoma	975.9	33.7
yes	male	55	24	1	3	1	4	no	no	no	no	no	left upper lobe of the lung	1	solid nodule	regular	yes	no	yes	yes	yes	no	yes	no	yes	yes	adenocarcinoma	125.2	1.07
no	male	73	33	2	2	0	3	no	no	no	no	no	right middle lobe of the lung	4	solid nodule	regular	yes	no	yes	yes	yes	no	yes	no	yes	no	adenocarcinoma	5.82	3.08
yes	male	55	22	1	1	0	2	no	no	yes	yes	yes	left upper lobe of the lung	1	solid nodule	regular	no	no	yes	yes	no	no	yes	no	yes	no	adenocarcinoma	3.91	2.02
yes	male	39	13	1	3	0	3	no	no	yes	no	no	right lower lobe of the lung	4	solid nodule	regular	no	no	yes	yes	yes	no	yes	no	no	yes	adenocarcinoma	3.61	4.27
no	female	63	10	1	0	0	1	no	no	no	no	no	left upper lobe of the lung	1	solid nodule	regular	no	no	yes	yes	no	no	yes	no	no	no	Non-small cell lung cancer other than adenocarcinoma	2.4	2.75
yes	male	41	10	1	0	0	1	no	no	yes	yes	no	right middle lobe of the lung	1	ground-glass nodule	regular	no	no	no	yes	no	no	yes	no	no	no	adenocarcinoma	1.13	1.3
yes	female	40	9	1	0	0	1	no	no	no	no	no	right middle lobe of the lung	2	ground-glass nodule	regular	no	no	yes	yes	yes	no	yes	no	no	no	adenocarcinoma	0.63	1.98
yes	male	61	37	2	3	1	4	no	yes	no	no	no	left upper lobe of the lung	4	solid nodule	regular	yes	no	yes	yes	yes	no	yes	yes	yes	yes	adenocarcinoma	280.2	2.87
yes	female	57	33	2	3	0	3	no	no	no	no	no	right upper lobe of the lung	4	solid nodule	regular	no	no	yes	yes	yes	no	yes	no	no	yes	adenocarcinoma	459	7.62
no	male	50	33	2	0	0	1	no	no	yes	yes	yes	right upper lobe of the lung	1	solid nodule	regular	yes	no	yes	yes	no	no	yes	no	yes	no	adenocarcinoma	7.11	1.27
yes	male	60	24	1	0	0	1	no	no	yes	yes	no	right upper lobe of the lung	2	solid nodule	regular	yes	no	yes	yes	yes	no	yes	no	no	no	adenocarcinoma	3.34	2.52
yes	female	41	49	2	3	1	4	yes	no	no	no	no	left lower lobe of the lung	4	solid nodule	regular	yes	no	yes	yes	yes	no	yes	yes	yes	yes	adenocarcinoma	135.7	180.9
yes	female	65	13	1	0	0	1	no	no	no	no	yes	right upper lobe of the lung	1	ground-glass nodule	regular	no	no	yes	yes	no	no	no	no	yes	no	adenocarcinoma	2.17	3.7
no	male	55	39	2	2	0	3	no	no	yes	yes	no	left lower lobe of the lung	2	solid nodule	regular	no	no	yes	yes	no	no	yes	yes	yes	yes	adenocarcinoma	17.36	5.07
yes	female	40	24	1	0	0	1	yes	no	no	no	no	right upper lobe of the lung	4	solid nodule	regular	yes	no	no	yes	yes	no	yes	no	no	no	adenocarcinoma	1.51	1.52
no	male	55	55	3	1	0	3	no	no	yes	yes	no	left lower lobe of the lung	1	solid nodule	regular	yes	yes	yes	yes	yes	no	yes	yes	yes	no	adenocarcinoma	3.46	2.96
no	female	47	8	1	0	0	1	no	no	no	no	no	left upper lobe of the lung	4	ground-glass nodule	regular	no	no	no	yes	no	no	no	no	yes	no	adenocarcinoma	1.04	0.96
yes	female	70	24	1	3	1	4	no	no	no	no	no	left upper lobe of the lung	1	solid nodule	regular	no	yes	yes	yes	yes	no	yes	no	yes	yes	adenocarcinoma	245.4	2.08
yes	female	63	20	1	0	0	1	no	no	no	no	no	left lower lobe of the lung	1	solid nodule	regular	no	no	yes	yes	yes	no	yes	no	no	no	adenocarcinoma	1.77	1.37
no	female	52	17	1	0	0	1	yes	no	no	no	no	right lower lobe of the lung	1	ground-glass nodule	regular	no	no	no	yes	no	no	yes	no	no	no	adenocarcinoma	2.05	2.06
yes	female	72	27	1	0	0	1	yes	no	no	no	no	left upper lobe of the lung	1	solid nodule	regular	no	no	yes	yes	no	no	yes	no	yes	no	adenocarcinoma	2.98	2.68
yes	female	68	35	2	3	1	4	no	no	no	no	no	right upper lobe of the lung	1	solid nodule	regular	no	no	yes	yes	yes	no	yes	no	no	yes	adenocarcinoma	85.89	5.32
no	male	74	26	1	3	1	4	no	no	yes	no	no	right upper lobe of the lung	4	solid nodule	regular	yes	no	yes	yes	yes	no	yes	no	no	yes	adenocarcinoma	14.72	10.74
no	female	50	12	1	2	0	3	no	no	no	no	no	right upper lobe of the lung	1	solid nodule	regular	no	no	yes	yes	yes	no	yes	no	no	yes	adenocarcinoma	0.57	1.01
no	male	75	24	2	2	1	4	yes	no	yes	no	no	right middle lobe of the lung	1	solid nodule	regular	no	no	yes	yes	no	no	yes	no	yes	no	adenocarcinoma	2.89	4.64
yes	male	59	19	1	0	0	1	no	no	no	no	no	right upper lobe of the lung	2	solid nodule	regular	no	no	yes	yes	yes	no	yes	no	no	no	adenocarcinoma	0.76	3
yes	female	46	9	1	0	0	1	no	no	no	no	no	left lower lobe of the lung	1	ground-glass nodule	regular	no	no	no	yes	no	no	no	no	no	no	adenocarcinoma	0.5	1.75
no	male	69	24	1	0	0	1	no	no	no	no	no	left lower lobe of the lung	1	solid nodule	regular	no	no	no	yes	yes	no	yes	no	yes	no	adenocarcinoma	3.25	6.08
yes	male	58	28	1	1	1	4	no	no	no	no	no	right lower lobe of the lung	1	solid nodule	regular	yes	no	yes	yes	yes	no	yes	no	yes	yes	adenocarcinoma	4.9	2.21
no	male	48	44	2	3	0	3	no	no	yes	yes	no	right upper lobe of the lung	1	solid nodule	regular	no	yes	yes	yes	yes	no	yes	yes	no	yes	adenocarcinoma	1.27	2.5
yes	female	62	39	2	3	0	3	no	no	no	no	no	left upper lobe of the lung	1	solid nodule	regular	no	no	yes	yes	yes	no	yes	yes	yes	yes	adenocarcinoma	3.41	6.37
yes	female	54	38	2	2	1	4	no	no	no	no	no	right lower lobe of the lung	1	solid nodule	regular	yes	yes	yes	yes	yes	no	yes	no	yes	no	adenocarcinoma	4.81	6.03
yes	female	54	40	2	3	1	4	no	no	no	no	no	right middle lobe of the lung	4	solid nodule	regular	no	no	yes	yes	no	no	yes	no	no	yes	adenocarcinoma	188.4	10.81
no	male	60	31	2	1	1	4	yes	yes	yes	yes	no	right lower lobe of the lung	1	solid nodule	regular	yes	no	yes	yes	yes	no	yes	no	yes	yes	adenocarcinoma	1.2	3.85
yes	female	38	31	2	0	1	4	no	yes	no	no	no	right upper lobe of the lung	1	solid nodule	regular	yes	no	yes	yes	no	no	yes	no	yes	no	adenocarcinoma	1.18	0.92
yes	male	66	18	1	1	0	2	no	no	yes	no	no	right lower lobe of the lung	1	ground-glass nodule	regular	no	no	yes	yes	yes	no	yes	no	no	no	adenocarcinoma	3.59	1.93
yes	male	59	31	2	0	0	1	no	no	yes	no	no	right lower lobe of the lung	2	solid nodule	regular	no	yes	yes	yes	yes	no	yes	no	no	no	adenocarcinoma	0.23	0.87
no	female	53	11	1	0	0	1	no	no	no	no	no	right upper lobe of the lung	2	solid nodule	regular	no	no	no	yes	no	no	yes	no	no	no	adenocarcinoma	1.05	2.45
no	female	55	30	1	1	1	4	no	no	no	no	no	left upper lobe of the lung	1	solid nodule	regular	no	no	yes	yes	yes	no	yes	yes	yes	yes	adenocarcinoma	139.7	3.92
no	male	68	22	1	2	1	4	no	no	yes	no	no	right middle lobe of the lung	4	solid nodule	regular	no	no	yes	yes	yes	no	yes	no	no	no	adenocarcinoma	878.7	19.81
yes	female	51	43	2	1	1	4	no	no	no	no	no	right lower lobe of the lung	4	solid nodule	regular	no	no	yes	yes	yes	no	yes	no	yes	no	adenocarcinoma	1.78	5.79
yes	female	64	35	2	2	1	4	no	no	no	no	no	left lower lobe of the lung	1	solid nodule	regular	no	no	yes	yes	yes	no	yes	yes	yes	yes	adenocarcinoma	8.07	3.77
yes	male	57	24	1	3	1	4	no	no	no	no	no	right upper lobe of the lung	4	solid nodule	regular	no	no	yes	yes	yes	no	yes	no	yes	yes	Non-small cell lung cancer other than adenocarcinoma	17.12	2
yes	male	60	36	2	2	1	4	no	no	yes	no	no	left upper lobe of the lung	4	solid nodule	regular	yes	no	yes	yes	yes	no	yes	no	yes	yes	adenocarcinoma	127.64	1.94
yes	male	64	31	2	1	1	4	no	yes	no	no	yes	left lower lobe of the lung	2	solid nodule	regular	no	no	yes	yes	yes	yes	yes	no	yes	no	adenocarcinoma	402	4.66
yes	male	51	35	2	3	0	3	yes	no	yes	yes	yes	left lower lobe of the lung	2	solid nodule	regular	no	no	yes	yes	yes	no	yes	no	no	yes	adenocarcinoma	5.22	12.06
yes	male	71	19	1	3	1	4	no	no	yes	no	no	right upper lobe of the lung	3	solid nodule	regular	no	yes	yes	yes	yes	no	yes	no	yes	yes	adenocarcinoma	12.43	3.13
no	male	64	27	1	3	1	4	yes	no	yes	no	no	right upper lobe of the lung	4	solid nodule	regular	no	no	yes	yes	yes	no	yes	no	yes	yes	adenocarcinoma	36.49	9.29
no	male	83	24	1	3	0	3	no	no	yes	yes	yes	left upper lobe of the lung	1	solid nodule	regular	no	no	yes	yes	yes	no	yes	no	yes	yes	adenocarcinoma	1.63	2.12
no	male	66	19	1	3	0	3	no	no	yes	no	yes	right upper lobe of the lung	4	solid nodule	regular	no	no	no	yes	yes	no	yes	no	no	yes	Non-small cell lung cancer other than adenocarcinoma	5	2
yes	male	63	40	2	3	1	4	yes	yes	no	no	no	left upper lobe of the lung	4	solid nodule	regular	no	no	yes	yes	no	no	yes	yes	yes	yes	adenocarcinoma	4.62	5.19
yes	female	69	24	1	2	1	4	no	no	no	no	yes	right lower lobe of the lung	2	solid nodule	regular	yes	no	yes	yes	yes	no	yes	no	yes	yes	adenocarcinoma	335.97	4.75
yes	female	40	17	1	2	1	4	no	yes	no	no	no	right lower lobe of the lung	4	solid nodule	regular	no	no	yes	yes	no	no	yes	no	yes	no	adenocarcinoma	515.8	0.77
yes	male	61	8	1	2	0	3	no	yes	no	no	no	right middle lobe of the lung	4	solid nodule	regular	no	no	no	yes	no	no	no	no	no	no	adenocarcinoma	1.52	2.03
no	male	68	57	3	2	0	3	no	yes	yes	yes	yes	right middle lobe of the lung	1	solid nodule	regular	no	no	yes	yes	no	no	yes	no	yes	yes	adenocarcinoma	3.59	5.04
yes	male	61	44	2	3	1	4	no	no	no	no	no	left upper lobe of the lung	4	solid nodule	regular	no	yes	yes	yes	yes	no	yes	no	yes	yes	adenocarcinoma	107.92	1.46
yes	male	51	27	1	0	0	1	yes	no	yes	no	no	left upper lobe of the lung	1	solid nodule	regular	no	no	yes	yes	yes	no	yes	no	no	yes	adenocarcinoma	2.15	1.93
yes	male	58	53	3	3	1	4	no	yes	yes	yes	no	right lower lobe of the lung	4	solid nodule	regular	no	no	yes	yes	yes	no	yes	yes	yes	yes	Non-small cell lung cancer other than adenocarcinoma	15.99	25.89
no	female	68	23	1	1	0	2	no	no	no	no	no	right lower lobe of the lung	2	solid nodule	regular	no	no	yes	yes	no	no	yes	no	yes	yes	adenocarcinoma	11.24	2.45
yes	male	50	18	1	1	1	4	no	no	no	no	yes	right upper lobe of the lung	4	solid nodule	regular	no	no	yes	yes	no	no	yes	no	yes	no	adenocarcinoma	1.76	1.16
no	female	70	36	2	3	1	4	yes	no	no	no	no	left upper lobe of the lung	1	solid nodule	regular	yes	no	yes	yes	yes	no	yes	no	yes	no	adenocarcinoma	82.89	3.17
yes	male	62	31	2	3	1	4	no	no	no	no	no	right upper lobe of the lung	1	solid nodule	regular	no	no	no	yes	yes	no	yes	yes	no	yes	adenocarcinoma	3.45	2.29
no	male	72	48	2	1	0	2	no	no	yes	yes	yes	right lower lobe of the lung	1	solid nodule	regular	no	no	no	yes	no	no	yes	yes	yes	no	adenocarcinoma	5.15	4.37
no	male	56	27	1	3	1	4	no	no	yes	yes	yes	right upper lobe of the lung	2	solid nodule	regular	no	no	yes	yes	yes	no	yes	no	no	yes	adenocarcinoma	141	4.52
no	male	70	16	1	0	0	1	no	no	yes	no	yes	right upper lobe of the lung	4	solid nodule	regular	no	no	yes	yes	yes	no	yes	no	no	yes	adenocarcinoma	1.48	1.77
yes	female	65	26	1	3	1	4	no	no	no	no	no	right upper lobe of the lung	1	solid nodule	regular	no	no	yes	yes	yes	no	no	no	yes	no	adenocarcinoma	6.52	2
no	female	61	7	1	0	0	1	yes	no	no	no	no	left upper lobe of the lung	4	solid nodule	irregular	no	no	no	no	no	no	no	no	no	no	adenocarcinoma	2.02	1.14
no	male	75	53	3	3	0	3	no	no	yes	yes	yes	right upper lobe of the lung	1	solid nodule	regular	no	yes	yes	yes	yes	no	yes	no	no	yes	adenocarcinoma	12.21	6.06
no	male	65	30	1	0	0	1	no	no	yes	no	no	right lower lobe of the lung	2	solid nodule	regular	no	no	yes	yes	yes	no	yes	no	yes	no	adenocarcinoma	3.7	3.43
yes	male	61	31	2	3	1	4	no	no	yes	no	no	right upper lobe of the lung	4	solid nodule	regular	no	no	no	yes	no	no	yes	no	no	yes	adenocarcinoma	235.3	7.5
no	male	57	65	3	1	0	3	no	no	yes	no	yes	left upper lobe of the lung	1	solid nodule	regular	yes	no	no	yes	yes	no	yes	no	no	no	Non-small cell lung cancer other than adenocarcinoma	2.73	10.42
yes	female	74	20	1	0	0	1	no	no	no	no	no	right upper lobe of the lung	3	solid nodule	regular	no	no	no	yes	yes	no	yes	no	no	no	adenocarcinoma	2.06	1.78
no	male	52	45	2	2	1	4	no	no	yes	yes	no	right lower lobe of the lung	1	solid nodule	regular	no	no	yes	yes	yes	yes	yes	no	no	yes	adenocarcinoma	65.21	5.9
no	male	74	17	1	2	0	3	no	no	no	no	yes	right upper lobe of the lung	1	solid nodule	regular	no	no	yes	yes	yes	no	yes	no	no	yes	Non-small cell lung cancer other than adenocarcinoma	5.45	1.96
yes	female	64	37	2	3	1	4	no	yes	no	no	no	right upper lobe of the lung	1	solid nodule	regular	no	no	yes	yes	yes	no	yes	yes	no	no	adenocarcinoma	3.11	0.83
yes	female	54	26	1	2	1	4	yes	no	no	no	no	left upper lobe of the lung	4	solid nodule	regular	no	yes	no	yes	no	yes	yes	yes	yes	no	adenocarcinoma	53.31	2.54
yes	female	65	29	1	0	1	4	yes	no	no	no	no	right lower lobe of the lung	4	solid nodule	regular	no	no	no	yes	yes	no	yes	no	no	no	adenocarcinoma	4.12	1.2
no	female	54	25	1	3	1	4	no	no	no	no	no	right lower lobe of the lung	1	solid nodule	regular	no	no	no	yes	yes	yes	yes	no	no	yes	adenocarcinoma	1.62	1.92
yes	female	64	20	1	3	1	4	no	no	no	no	no	right upper lobe of the lung	4	solid nodule	regular	no	no	no	yes	yes	no	yes	no	no	no	adenocarcinoma	7.36	7.06
no	male	75	126	4	2	0	3	no	no	no	no	no	right lower lobe of the lung	1	solid nodule	regular	yes	no	yes	yes	yes	yes	yes	yes	yes	no	adenocarcinoma	18.36	7.43
no	male	60	25	1	3	1	4	no	no	yes	no	yes	left lower lobe of the lung	1	solid nodule	regular	no	no	no	no	no	no	no	no	no	no	adenocarcinoma	8.08	1.76
no	male	63	28	1	3	1	4	no	no	yes	yes	yes	left lower lobe of the lung	4	solid nodule	regular	no	no	yes	yes	yes	no	yes	yes	yes	yes	adenocarcinoma	258.6	10.2
no	male	51	18	1	2	1	4	no	no	yes	no	yes	left upper lobe of the lung	4	solid nodule	regular	no	no	yes	yes	yes	no	yes	no	yes	yes	adenocarcinoma	8.41	0.86
yes	female	68	20	1	2	1	4	no	no	no	no	no	right lower lobe of the lung	4	solid nodule	regular	no	no	no	yes	no	no	yes	no	no	yes	adenocarcinoma	5.5	3.08
yes	male	47	43	2	3	0	3	no	no	yes	no	no	right upper lobe of the lung	1	solid nodule	regular	no	no	no	yes	yes	no	yes	yes	yes	yes	adenocarcinoma	3.48	5.75
no	female	75	13	1	0	0	1	yes	no	no	no	no	right middle lobe of the lung	1	solid nodule	regular	no	no	no	yes	no	no	yes	no	no	no	adenocarcinoma	1.13	2.88
no	male	56	79	4	3	1	4	no	no	yes	no	no	right upper lobe of the lung	1	solid nodule	regular	no	no	no	yes	yes	no	yes	yes	yes	yes	adenocarcinoma	116.9	20.84
no	male	65	37	2	3	0	3	no	no	yes	no	yes	right upper lobe of the lung	1	solid nodule	regular	no	no	yes	yes	no	no	yes	yes	yes	no	Non-small cell lung cancer other than adenocarcinoma	4.54	9.7
no	female	50	72	4	1	1	4	no	no	no	no	no	left lower lobe of the lung	4	solid nodule	regular	no	no	yes	yes	yes	no	yes	yes	yes	no	adenocarcinoma	3.93	1.67
yes	female	45	28	1	1	1	4	no	no	no	no	no	right lower lobe of the lung	4	solid nodule	regular	no	no	no	yes	no	no	yes	no	no	yes	adenocarcinoma	9.79	2.47
yes	female	72	21	1	1	1	4	no	no	no	no	no	left upper lobe of the lung	4	solid nodule	regular	no	no	yes	yes	yes	no	yes	no	yes	yes	adenocarcinoma	1.98	3.81
no	female	52	71	4	3	1	4	yes	no	no	no	no	right lower lobe of the lung	4	solid nodule	regular	no	no	yes	yes	yes	no	yes	yes	no	yes	adenocarcinoma	112.7	9.61
yes	female	62	37	2	2	1	4	yes	no	no	no	no	right upper lobe of the lung	1	solid nodule	regular	no	no	no	no	no	no	no	no	yes	yes	adenocarcinoma	27.1	14.21
no	female	78	57	3	3	0	3	no	no	no	no	no	right lower lobe of the lung	4	solid nodule	regular	yes	no	yes	yes	yes	no	yes	yes	yes	yes	adenocarcinoma	4.22	19.74
yes	female	71	31	2	1	0	2	no	no	no	no	no	left upper lobe of the lung	1	solid nodule	regular	no	yes	yes	yes	no	no	yes	yes	yes	yes	adenocarcinoma	7.32	1.28
no	male	60	73	4	2	1	4	no	no	yes	yes	no	left lower lobe of the lung	4	solid nodule	regular	yes	no	yes	yes	yes	no	yes	no	yes	yes	Non-small cell lung cancer other than adenocarcinoma	1.71	79.62
no	male	84	21	1	0	0	1	no	no	yes	yes	yes	right middle lobe of the lung	2	solid nodule	regular	no	no	yes	yes	yes	no	yes	no	no	no	adenocarcinoma	4.83	2.38
no	female	63	29	1	3	1	4	no	no	no	no	no	right lower lobe of the lung	4	solid nodule	regular	yes	no	no	yes	no	no	yes	no	no	yes	adenocarcinoma	512.9	67.3
no	male	76	18	1	1	0	2	no	no	no	no	no	left upper lobe of the lung	1	solid nodule	regular	no	no	yes	yes	no	no	yes	no	yes	no	adenocarcinoma	3.33	2.62
yes	male	58	14	1	3	1	4	yes	no	yes	yes	yes	right lower lobe of the lung	1	solid nodule	regular	no	no	no	no	no	no	yes	no	no	yes	adenocarcinoma	286.2	12.9
yes	female	71	80	4	3	1	4	yes	no	no	no	no	left upper lobe of the lung	4	solid nodule	regular	no	no	no	no	no	no	yes	no	no	yes	Non-small cell lung cancer other than adenocarcinoma	0.36	3.94
no	male	64	47	2	1	0	2	no	no	no	no	no	right lower lobe of the lung	1	solid nodule	regular	no	no	no	yes	no	no	yes	yes	no	no	adenocarcinoma	68.17	4.35
yes	female	63	35	2	0	0	1	no	no	no	no	no	left lower lobe of the lung	1	solid nodule	regular	yes	no	yes	yes	yes	no	yes	yes	no	no	adenocarcinoma	4.57	1.58
no	male	74	16	1	0	0	1	yes	no	yes	yes	yes	right upper lobe of the lung	1	solid nodule	regular	no	no	no	no	no	no	yes	no	no	no	adenocarcinoma	6.57	3.79
yes	female	56	39	2	1	1	4	yes	no	no	no	no	left upper lobe of the lung	4	solid nodule	regular	no	no	no	yes	yes	no	yes	no	no	no	adenocarcinoma	88.41	1.75
yes	female	53	55	3	3	1	4	no	no	no	no	no	left upper lobe of the lung	1	solid nodule	regular	no	no	no	no	no	yes	yes	yes	no	yes	adenocarcinoma	692.5	19.67
no	male	60	77	4	2	0	3	no	no	yes	yes	no	right lower lobe of the lung	1	solid nodule	regular	no	no	no	yes	no	no	yes	no	no	no	adenocarcinoma	3.44	3.13
yes	male	47	12	1	0	0	1	no	no	no	no	no	left upper lobe of the lung	1	subsolid nodule	regular	no	yes	no	no	no	no	yes	no	no	no	adenocarcinoma	0.369	3.93
no	female	68	31	2	0	0	1	no	no	no	no	no	left upper lobe of the lung	1	solid nodule	regular	no	no	no	yes	yes	yes	yes	yes	no	no	adenocarcinoma	0.72	4.23
no	male	56	63	3	1	1	4	no	no	yes	yes	yes	left upper lobe of the lung	1	solid nodule	regular	no	no	no	yes	yes	yes	yes	no	no	yes	adenocarcinoma	4.41	3.21
yes	male	75	17	1	0	0	1	no	yes	no	no	no	right lower lobe of the lung	4	solid nodule	regular	no	no	no	no	no	no	yes	no	no	no	adenocarcinoma	3.74	4.87
yes	female	71	19	1	0	0	1	no	yes	no	no	yes	left lower lobe of the lung	1	ground-glass nodule	regular	no	no	yes	yes	yes	no	yes	no	no	no	adenocarcinoma	4.09	1.68
yes	male	70	22	1	0	0	1	no	no	no	no	no	right middle lobe of the lung	1	solid nodule	regular	no	no	no	no	no	no	yes	yes	no	no	adenocarcinoma	2.93	1.77
no	male	54	15	1	0	0	1	no	no	yes	yes	yes	right upper lobe of the lung	2	solid nodule	regular	no	yes	yes	no	no	no	yes	no	no	no	adenocarcinoma	3.56	2.49
no	female	46	8	1	0	0	1	no	no	no	no	no	right middle lobe of the lung	1	ground-glass nodule	regular	no	no	no	no	no	no	yes	no	no	no	adenocarcinoma	1.18	4.82
no	male	69	30	1	3	0	3	no	yes	yes	yes	yes	right upper lobe of the lung	1	solid nodule	regular	no	no	no	yes	yes	no	yes	no	no	no	Non-small cell lung cancer other than adenocarcinoma	2.346	3.84
no	male	77	70	3	3	1	4	no	no	yes	yes	yes	right upper lobe of the lung	1	solid nodule	regular	no	no	yes	no	yes	yes	yes	yes	no	yes	adenocarcinoma	69.18	7.75
yes	male	61	22	1	3	1	4	no	no	no	no	no	left upper lobe of the lung	1	solid nodule	regular	no	no	yes	yes	no	no	yes	yes	no	yes	adenocarcinoma	245.4	12.73
yes	male	55	33	2	0	0	1	yes	yes	no	no	no	left upper lobe of the lung	1	solid nodule	regular	no	no	yes	no	yes	no	yes	yes	no	no	adenocarcinoma	1.44	2.18
yes	female	71	26	1	3	1	4	yes	no	no	no	no	right upper lobe of the lung	1	solid nodule	regular	no	no	yes	no	yes	yes	yes	no	no	yes	adenocarcinoma	2.34	1.77
no	male	57	37	2	3	1	4	yes	yes	yes	yes	yes	left upper lobe of the lung	4	solid nodule	regular	no	no	no	yes	no	no	yes	no	no	yes	Non-small cell lung cancer other than adenocarcinoma	5.66	7.28
yes	male	69	24	1	0	1	4	no	no	no	no	no	left upper lobe of the lung	1	solid nodule	regular	no	no	yes	yes	yes	no	yes	no	no	no	adenocarcinoma	2722	19.22
yes	male	46	49	2	3	1	4	no	no	yes	yes	no	right upper lobe of the lung	1	solid nodule	regular	no	no	no	no	no	no	yes	yes	yes	yes	adenocarcinoma	474.9	5.9
yes	male	69	26	1	0	1	4	no	no	no	no	no	left upper lobe of the lung	4	solid nodule	regular	no	no	no	no	yes	no	yes	no	no	no	adenocarcinoma	404.1	16.21
no	female	59	24	1	0	0	1	yes	no	no	no	no	right upper lobe of the lung	1	solid nodule	regular	no	no	no	yes	yes	no	yes	yes	no	no	adenocarcinoma	8.07	1.08
yes	male	68	34	2	3	1	4	no	no	yes	yes	yes	right upper lobe of the lung	1	solid nodule	regular	no	yes	yes	no	yes	no	yes	yes	no	yes	adenocarcinoma	5774	41.61
no	male	73	25	1	0	0	1	no	no	yes	yes	yes	right lower lobe of the lung	1	solid nodule	regular	no	no	yes	yes	yes	no	yes	no	no	no	adenocarcinoma	747.6	30.33
no	male	66	26	1	0	0	1	no	no	yes	yes	no	left upper lobe of the lung	1	solid nodule	regular	no	no	no	yes	yes	no	yes	no	no	no	adenocarcinoma	8.89	2.52
no	male	49	57	3	2	1	4	no	no	yes	no	no	right upper lobe of the lung	1	solid nodule	regular	no	no	no	no	no	no	yes	no	yes	no	Non-small cell lung cancer other than adenocarcinoma	0.56	3.65
yes	female	40	45	2	0	1	4	no	no	no	no	no	right upper lobe of the lung	1	solid nodule	regular	no	yes	no	yes	yes	no	yes	no	no	no	adenocarcinoma	7.34	2.31
no	female	30	5	1	0	0	1	yes	no	no	no	no	left upper lobe of the lung	1	ground-glass nodule	irregular	no	no	no	no	no	no	yes	no	no	no	adenocarcinoma	0.57	1.24
yes	female	46	62	3	2	1	4	no	yes	no	no	no	left upper lobe of the lung	1	solid nodule	regular	no	no	no	yes	no	no	yes	yes	yes	no	adenocarcinoma	97.37	6.4
yes	female	51	38	2	3	1	4	yes	yes	no	no	no	right lower lobe of the lung	1	solid nodule	regular	no	no	yes	no	no	no	yes	no	no	no	adenocarcinoma	33.74	1.29
yes	female	59	17	1	1	1	4	no	no	no	no	no	left upper lobe of the lung	1	solid nodule	regular	no	no	no	no	no	no	no	no	no	no	adenocarcinoma	1.27	1.58
yes	female	74	30	1	1	1	4	no	no	no	no	no	left upper lobe of the lung	4	solid nodule	regular	no	no	no	no	yes	no	yes	no	no	no	adenocarcinoma	25.38	2.27
yes	female	63	18	1	0	1	4	yes	no	no	no	no	right upper lobe of the lung	2	solid nodule	regular	no	no	no	no	no	no	yes	no	no	no	adenocarcinoma	2.46	1.22
yes	male	58	63	3	3	1	4	no	no	yes	no	yes	left lower lobe of the lung	4	solid nodule	regular	no	no	no	no	no	no	yes	no	no	yes	adenocarcinoma	388.55	17.02
yes	female	68	17	1	0	0	1	no	no	no	no	no	right lower lobe of the lung	1	ground-glass nodule	regular	no	no	no	no	no	no	yes	no	no	no	adenocarcinoma	6.61	3.08
no	male	68	49	2	3	0	3	no	no	yes	yes	yes	right upper lobe of the lung	1	solid nodule	regular	no	no	no	no	yes	no	yes	no	no	yes	Non-small cell lung cancer other than adenocarcinoma	4.64	6.37
no	male	52	47	2	0	0	1	no	no	no	no	no	left lower lobe of the lung	1	solid nodule	regular	no	no	no	yes	no	no	yes	no	no	no	Non-small cell lung cancer other than adenocarcinoma	1.88	3.55
no	female	75	47	2	3	0	3	yes	no	no	no	no	right lower lobe of the lung	1	solid nodule	regular	no	no	no	no	no	no	yes	yes	no	no	adenocarcinoma	3.66	5.43
yes	male	56	47	2	3	1	4	yes	no	yes	yes	no	left upper lobe of the lung	1	solid nodule	regular	no	no	no	no	no	no	yes	yes	no	no	adenocarcinoma	5.37	2.27
no	male	70	43	2	1	0	2	no	no	yes	no	yes	left upper lobe of the lung	1	solid nodule	regular	no	no	no	yes	no	no	yes	no	no	no	adenocarcinoma	1.45	1.55
yes	female	61	73	4	2	0	3	no	no	no	no	no	right upper lobe of the lung	1	solid nodule	regular	no	no	no	no	no	no	yes	no	no	yes	adenocarcinoma	39.38	4.77
no	male	70	85	4	2	0	3	yes	no	yes	no	yes	left lower lobe of the lung	1	solid nodule	regular	no	no	no	no	no	yes	yes	yes	no	yes	Non-small cell lung cancer other than adenocarcinoma	7.44	39.22
yes	female	58	20	1	0	1	4	yes	yes	no	no	no	left lower lobe of the lung	1	solid nodule	regular	no	no	no	no	yes	no	yes	yes	no	no	adenocarcinoma	4.86	2.59
yes	female	67	35	2	2	1	4	no	no	no	no	yes	right upper lobe of the lung	4	solid nodule	regular	no	no	yes	no	no	no	yes	no	no	yes	adenocarcinoma	162.5	28.32
yes	male	54	18	1	3	1	4	no	no	no	no	no	right lower lobe of the lung	4	solid nodule	regular	no	no	no	yes	no	no	yes	no	no	no	adenocarcinoma	1.43	3.17
yes	female	60	19	1	3	1	4	yes	no	no	no	no	right lower lobe of the lung	4	solid nodule	regular	no	no	no	no	no	no	yes	no	no	yes	adenocarcinoma	237.2	13.17
no	male	64	55	3	0	1	4	no	yes	no	no	no	right lower lobe of the lung	1	solid nodule	regular	no	no	no	yes	no	no	yes	no	no	no	Non-small cell lung cancer other than adenocarcinoma	404.1	4.52
no	male	71	70	3	2	1	4	no	no	yes	no	yes	right upper lobe of the lung	4	solid nodule	regular	no	no	no	no	no	no	yes	no	no	no	Non-small cell lung cancer other than adenocarcinoma	1.25	16.52
no	male	77	33	2	3	0	3	yes	no	yes	no	yes	left lower lobe of the lung	4	solid nodule	regular	no	no	no	yes	no	no	yes	no	no	no	Non-small cell lung cancer other than adenocarcinoma	1.98	5.29
no	male	59	19	1	3	0	3	no	no	no	no	yes	left upper lobe of the lung	1	solid nodule	regular	no	no	yes	yes	yes	no	yes	no	no	no	adenocarcinoma	5.59	5.55
yes	female	63	17	1	1	0	2	no	no	no	no	no	right upper lobe of the lung	1	solid nodule	regular	no	no	no	yes	yes	no	yes	no	no	no	adenocarcinoma	3.79	2.08
yes	female	66	62	3	0	0	2	no	no	no	no	no	right upper lobe of the lung	1	subsolid nodule	regular	no	no	yes	no	yes	no	yes	yes	no	no	adenocarcinoma	3.53	2.02
no	male	75	22	1	3	1	4	no	no	no	no	no	right upper lobe of the lung	1	solid nodule	regular	no	no	no	no	yes	no	yes	no	no	yes	Non-small cell lung cancer other than adenocarcinoma	29.45	4.13
no	male	58	54	3	3	1	4	no	no	no	no	yes	left upper lobe of the lung	1	solid nodule	regular	no	no	no	yes	no	yes	no	no	yes	yes	Non-small cell lung cancer other than adenocarcinoma	3.08	18.59
yes	female	33	8	1	0	0	2	no	no	no	no	no	left upper lobe of the lung	1	ground-glass nodule	regular	no	yes	no	no	no	no	yes	no	no	no	adenocarcinoma	0.94	1
no	female	53	66	3	0	1	4	no	no	no	no	no	left lower lobe of the lung	1	solid nodule	regular	no	no	no	yes	no	no	yes	no	no	no	adenocarcinoma	22.34	2.47
yes	female	60	41	2	3	1	4	no	no	no	no	no	right lower lobe of the lung	4	solid nodule	regular	no	no	no	yes	yes	no	yes	no	no	yes	Non-small cell lung cancer other than adenocarcinoma	196.3	5.93
yes	male	62	36	2	0	0	1	yes	yes	yes	yes	yes	left upper lobe of the lung	4	solid nodule	regular	no	no	no	yes	yes	no	yes	no	no	yes	adenocarcinoma	36.51	7.06
yes	female	51	17	1	0	0	1	no	no	no	no	no	right lower lobe of the lung	1	solid nodule	regular	no	no	yes	no	yes	no	yes	no	no	no	adenocarcinoma	61.53	2.92
yes	male	56	22	1	0	0	1	yes	no	no	no	no	left lower lobe of the lung	1	solid nodule	regular	no	no	no	yes	yes	no	yes	no	no	no	adenocarcinoma	9.21	2.8
yes	female	70	29	1	1	1	4	yes	no	no	no	no	right upper lobe of the lung	4	solid nodule	regular	yes	no	yes	no	yes	no	yes	yes	no	no	adenocarcinoma	3.13	2.13
yes	female	55	24	1	0	0	1	no	yes	no	no	no	right lower lobe of the lung	1	ground-glass nodule	regular	no	no	no	yes	yes	no	yes	no	no	no	adenocarcinoma	1.19	1.38
no	female	52	27	1	3	1	4	no	yes	no	no	no	left upper lobe of the lung	4	solid nodule	regular	no	no	no	yes	yes	no	yes	no	no	yes	adenocarcinoma	6.92	3.26
no	male	71	94	4	2	1	4	no	no	yes	no	no	left upper lobe of the lung	4	solid nodule	regular	no	no	no	no	no	no	yes	no	no	no	Non-small cell lung cancer other than adenocarcinoma	18.11	20.5
no	female	53	6	4	0	0	3	no	yes	no	no	no	left lower lobe of the lung	1	solid nodule	regular	no	no	no	no	no	no	no	no	no	no	adenocarcinoma	2.44	1.25
yes	female	52	67	3	3	1	4	no	yes	no	no	no	right upper lobe of the lung	4	solid nodule	regular	no	no	no	no	yes	no	yes	no	no	yes	adenocarcinoma	49.56	2.01
yes	female	67	16	1	0	0	1	no	no	no	no	no	right lower lobe of the lung	1	solid nodule	regular	no	no	no	no	yes	no	yes	no	no	no	adenocarcinoma	1.35	1.66
no	female	53	59	3	0	1	4	yes	no	no	no	no	left lower lobe of the lung	4	solid nodule	regular	no	no	no	yes	yes	no	yes	no	no	no	adenocarcinoma	1.03	3.14
yes	female	75	54	3	0	1	4	no	no	no	no	no	left lower lobe of the lung	4	solid nodule	regular	no	no	no	yes	yes	no	yes	no	no	no	adenocarcinoma	206.9	3.59
no	male	69	81	4	1	1	4	no	no	yes	no	yes	left lower lobe of the lung	1	solid nodule	regular	no	no	no	yes	no	no	no	no	no	no	adenocarcinoma	3.85	4.57
yes	female	74	43	2	2	0	2	no	no	no	no	no	right upper lobe of the lung	1	solid nodule	regular	no	no	yes	yes	yes	yes	yes	no	no	yes	adenocarcinoma	2.96	4.06
no	male	65	53	3	3	1	4	yes	no	yes	no	no	left lower lobe of the lung	1	solid nodule	regular	no	no	no	yes	no	no	no	no	no	yes	Non-small cell lung cancer other than adenocarcinoma	1.87	8.47
no	male	56	112	4	2	1	4	no	no	yes	no	yes	left upper lobe of the lung	1	solid nodule	irregular	no	no	no	no	no	no	yes	no	yes	yes	Non-small cell lung cancer other than adenocarcinoma	1.17	19.57
no	male	79	36	2	2	1	4	no	no	no	no	yes	left lower lobe of the lung	1	solid nodule	regular	no	no	no	yes	yes	no	yes	no	no	no	Non-small cell lung cancer other than adenocarcinoma	4.78	2.29
no	male	70	18	1	1	1	4	no	yes	yes	no	yes	left upper lobe of the lung	1	solid nodule	regular	no	no	no	yes	yes	no	yes	no	no	no	Non-small cell lung cancer other than adenocarcinoma	2.37	12.78
yes	male	80	21	1	2	1	4	yes	no	yes	yes	no	left upper lobe of the lung	1	solid nodule	regular	no	no	yes	yes	yes	no	yes	yes	no	no	adenocarcinoma	2.55	1.75
yes	female	74	39	2	1	1	4	yes	no	no	no	no	left upper lobe of the lung	2	solid nodule	regular	no	no	no	yes	yes	yes	yes	no	no	no	adenocarcinoma	1.84	2.75
yes	female	55	20	1	1	0	2	no	no	no	no	no	right lower lobe of the lung	1	solid nodule	regular	yes	no	no	yes	no	no	yes	no	no	no	adenocarcinoma	1.23	1.6
no	female	72	24	1	0	0	1	no	no	no	no	no	right upper lobe of the lung	1	solid nodule	regular	no	no	no	yes	no	no	yes	no	no	no	adenocarcinoma	2.07	3.09
yes	female	54	26	1	0	0	1	yes	no	no	no	no	right upper lobe of the lung	1	solid nodule	regular	no	no	no	yes	yes	no	yes	yes	no	no	adenocarcinoma	9.47	0.81
yes	male	71	11	1	0	1	4	no	no	yes	yes	yes	right middle lobe of the lung	4	solid nodule	regular	no	no	no	yes	yes	no	yes	no	no	no	adenocarcinoma	2.11	1.25
yes	female	55	45	2	2	1	4	no	no	no	no	no	right upper lobe of the lung	1	solid nodule	regular	no	no	yes	no	yes	yes	yes	no	no	yes	adenocarcinoma	43.47	1.74
yes	female	56	42	2	2	0	3	no	no	no	no	no	right upper lobe of the lung	3	solid nodule	regular	no	yes	yes	yes	yes	no	yes	yes	no	yes	adenocarcinoma	25.44	11.87
no	male	74	97	4	1	1	4	no	no	no	no	no	left upper lobe of the lung	1	solid nodule	regular	no	no	no	no	no	no	yes	no	no	no	Non-small cell lung cancer other than adenocarcinoma	16.37	20.92
no	male	48	16	1	0	0	1	no	no	yes	yes	no	left upper lobe of the lung	1	solid nodule	regular	no	no	yes	yes	yes	no	yes	no	no	no	adenocarcinoma	0.9	3.67
yes	female	56	51	3	3	1	4	no	no	no	no	no	right lower lobe of the lung	1	solid nodule	regular	no	no	no	yes	yes	no	yes	yes	no	no	adenocarcinoma	126	10.5
yes	female	56	21	1	0	0	1	yes	no	no	no	no	right upper lobe of the lung	1	subsolid nodule	regular	no	no	yes	yes	yes	no	yes	yes	no	no	adenocarcinoma	3.39	0.98
yes	male	39	27	1	1	0	2	no	no	no	no	no	right lower lobe of the lung	1	solid nodule	regular	yes	no	no	yes	yes	no	yes	yes	no	no	adenocarcinoma	73.57	4.34
yes	female	82	46	2	3	1	4	no	no	no	no	no	left lower lobe of the lung	1	solid nodule	regular	no	no	no	yes	yes	no	yes	yes	no	yes	adenocarcinoma	80.79	6.12
no	male	68	73	4	2	1	4	no	no	no	no	yes	right lower lobe of the lung	1	solid nodule	regular	no	yes	no	no	no	yes	yes	no	yes	yes	Non-small cell lung cancer other than adenocarcinoma	2.83	4.19
yes	male	78	53	3	1	0	3	no	no	no	no	no	right upper lobe of the lung	1	solid nodule	regular	no	no	yes	yes	yes	yes	yes	no	no	no	adenocarcinoma	19.18	12.73
no	male	49	35	2	0	0	1	no	no	no	no	no	right lower lobe of the lung	1	solid nodule	regular	no	no	no	no	no	no	yes	yes	yes	no	Non-small cell lung cancer other than adenocarcinoma	2.33	4.66
no	male	69	34	2	2	0	3	yes	no	no	no	no	left upper lobe of the lung	1	solid nodule	regular	no	no	yes	yes	yes	no	yes	no	no	yes	adenocarcinoma	41.61	5.78
no	female	89	26	1	3	1	4	no	yes	no	no	no	right middle lobe of the lung	1	solid nodule	regular	no	no	no	yes	yes	no	yes	no	no	yes	adenocarcinoma	9.69	2.97
yes	female	66	46	2	2	1	4	no	no	no	no	no	right upper lobe of the lung	1	solid nodule	regular	no	no	yes	no	yes	no	yes	no	no	no	adenocarcinoma	78.86	2.77
yes	male	66	34	2	0	0	1	no	no	no	no	no	left upper lobe of the lung	1	solid nodule	regular	no	no	no	yes	no	no	yes	yes	no	no	adenocarcinoma	0.9	2.42
no	female	66	69	3	2	1	4	no	no	no	no	no	right lower lobe of the lung	4	solid nodule	regular	no	yes	no	yes	no	no	yes	no	no	no	adenocarcinoma	3.49	3.87
yes	female	67	34	2	1	0	2	no	no	no	no	no	left lower lobe of the lung	1	solid nodule	regular	no	no	no	yes	no	no	yes	yes	no	no	adenocarcinoma	1.76	2.03
yes	female	46	15	1	0	1	4	no	no	no	no	no	right lower lobe of the lung	1	solid nodule	regular	no	no	yes	no	yes	no	yes	no	no	no	adenocarcinoma	13.13	1.92
yes	female	64	23	1	2	1	4	no	no	no	no	no	right middle lobe of the lung	1	solid nodule	regular	no	no	yes	no	yes	no	yes	no	no	no	adenocarcinoma	22.14	2.57
no	male	49	32	2	3	1	4	no	no	no	no	no	right upper lobe of the lung	4	solid nodule	regular	no	no	yes	no	no	no	yes	no	no	yes	Non-small cell lung cancer other than adenocarcinoma	1.15	41.26
yes	male	72	32	2	3	0	3	yes	no	yes	yes	no	left upper lobe of the lung	4	solid nodule	regular	no	no	no	yes	yes	no	yes	no	no	no	adenocarcinoma	36.01	1.2
no	male	56	70	3	2	1	4	yes	no	yes	no	yes	left lower lobe of the lung	1	solid nodule	regular	no	no	yes	yes	yes	no	yes	yes	no	yes	adenocarcinoma	4.72	23.27
yes	male	51	27	1	0	1	4	yes	no	yes	yes	no	right lower lobe of the lung	1	solid nodule	regular	no	no	yes	yes	yes	no	yes	no	no	no	adenocarcinoma	12.72	1.61
yes	female	78	59	3	2	1	4	no	no	no	no	no	left upper lobe of the lung	4	solid nodule	regular	no	no	yes	yes	yes	no	yes	yes	no	yes	adenocarcinoma	18.98	3.6
yes	female	60	33	2	3	1	4	no	no	no	no	no	left lower lobe of the lung	1	solid nodule	regular	no	no	yes	no	no	no	yes	yes	no	no	adenocarcinoma	2.42	1.49
yes	female	85	51	3	2	1	4	no	no	no	no	no	right upper lobe of the lung	1	solid nodule	regular	no	no	yes	yes	yes	no	yes	yes	no	yes	adenocarcinoma	53.54	7.55
yes	female	57	37	2	1	1	4	yes	yes	no	no	no	right lower lobe of the lung	2	solid nodule	regular	no	no	yes	yes	yes	no	yes	yes	no	no	adenocarcinoma	5.82	1.09
yes	female	61	24	1	3	1	4	no	no	no	no	no	right upper lobe of the lung	4	solid nodule	regular	no	no	yes	no	yes	no	yes	yes	no	yes	adenocarcinoma	12.61	20.86
yes	male	32	14	1	3	1	4	no	no	yes	yes	no	right lower lobe of the lung	1	solid nodule	regular	no	no	yes	no	yes	no	yes	no	no	yes	Non-small cell lung cancer other than adenocarcinoma	4.04	2.84
no	male	53	44	2	3	1	4	yes	no	yes	yes	yes	left upper lobe of the lung	1	solid nodule	regular	yes	no	yes	yes	yes	no	yes	no	no	yes	adenocarcinoma	3.9	31.25
no	male	49	17	1	0	0	1	no	no	yes	yes	no	right lower lobe of the lung	1	solid nodule	regular	no	no	no	yes	yes	no	yes	no	no	no	adenocarcinoma	3.61	2.82
no	male	73	25	1	0	0	1	no	no	yes	yes	yes	left upper lobe of the lung	2	solid nodule	regular	no	no	yes	yes	yes	yes	yes	no	no	no	adenocarcinoma	34.26	3.93
yes	female	64	45	2	2	1	4	no	no	no	no	no	left upper lobe of the lung	1	solid nodule	regular	no	no	yes	yes	yes	no	yes	no	no	yes	adenocarcinoma	38.07	6.07
yes	female	61	20	1	3	1	4	yes	yes	no	no	no	right upper lobe of the lung	1	solid nodule	regular	no	no	yes	yes	yes	no	yes	no	no	yes	adenocarcinoma	32.84	3.2
no	female	62	24	1	0	0	1	yes	yes	no	no	no	left upper lobe of the lung	2	solid nodule	regular	no	no	yes	yes	yes	no	yes	no	no	no	adenocarcinoma	3.91	2.2
no	male	78	31	2	2	0	3	no	no	yes	no	yes	left lower lobe of the lung	2	solid nodule	regular	no	no	yes	yes	yes	no	yes	no	no	yes	Non-small cell lung cancer other than adenocarcinoma	4.3	3.39
no	female	56	32	2	2	0	3	no	no	no	no	yes	right lower lobe of the lung	1	solid nodule	regular	no	no	yes	yes	yes	no	yes	yes	no	yes	adenocarcinoma	3.3	1.98
no	female	55	42	2	1	1	4	no	no	no	no	no	right middle lobe of the lung	1	solid nodule	regular	no	no	yes	yes	yes	no	yes	no	no	no	adenocarcinoma	99.87	41.57
yes	male	51	12	1	0	1	4	no	no	no	no	no	left lower lobe of the lung	1	solid nodule	regular	no	no	yes	yes	yes	no	yes	no	no	no	adenocarcinoma	2.11	1.86
yes	female	61	24	1	2	0	3	no	yes	no	no	no	right upper lobe of the lung	1	solid nodule	regular	no	no	yes	no	yes	no	yes	no	no	no	adenocarcinoma	4.89	3.22
yes	female	40	17	1	3	0	3	yes	no	no	no	no	left upper lobe of the lung	1	solid nodule	regular	no	no	yes	yes	yes	no	yes	no	no	yes	adenocarcinoma	75.86	1.2
no	male	75	41	2	3	0	3	no	no	yes	yes	no	left upper lobe of the lung	1	solid nodule	regular	no	no	yes	yes	no	no	yes	yes	no	no	Non-small cell lung cancer other than adenocarcinoma	2.053	1.94
yes	female	67	28	1	0	0	1	yes	yes	no	no	no	right upper lobe of the lung	2	ground-glass nodule	regular	no	no	no	yes	yes	no	yes	yes	no	no	adenocarcinoma	1.68	1.41
yes	female	62	41	2	3	1	4	no	no	no	no	no	right lower lobe of the lung	4	solid nodule	regular	no	yes	no	yes	no	no	yes	no	no	yes	adenocarcinoma	8.14	23
yes	female	51	24	1	2	0	3	no	no	no	no	no	right upper lobe of the lung	1	solid nodule	regular	no	no	no	yes	yes	no	yes	no	no	no	adenocarcinoma	6.14	3.32
no	male	84	61	3	3	1	4	no	no	yes	yes	yes	left upper lobe of the lung	1	solid nodule	regular	no	no	yes	no	yes	yes	yes	no	no	yes	adenocarcinoma	282.3	26.87
yes	female	51	7	1	0	0	1	no	no	no	no	no	right upper lobe of the lung	1	solid nodule	regular	no	no	no	yes	yes	no	yes	no	no	no	adenocarcinoma	1.84	0.96
no	male	72	48	2	3	0	3	no	no	yes	no	yes	left upper lobe of the lung	4	solid nodule	regular	no	no	yes	yes	yes	no	yes	yes	no	yes	Non-small cell lung cancer other than adenocarcinoma	2.92	35.63
no	male	65	52	3	2	0	3	no	no	yes	yes	yes	left upper lobe of the lung	2	solid nodule	regular	no	no	yes	no	no	no	yes	no	no	yes	adenocarcinoma	5.81	6.09
yes	male	44	31	2	0	1	4	no	no	no	no	no	right lower lobe of the lung	1	solid nodule	regular	no	no	yes	no	yes	no	yes	yes	no	no	adenocarcinoma	9.35	3.03
yes	female	49	22	1	3	1	4	no	no	no	no	no	left upper lobe of the lung	1	solid nodule	regular	no	no	no	yes	yes	no	yes	no	no	yes	adenocarcinoma	70.195	3.08

## Sheet: The validation cohort
EGFR Mutation Status	Sex	Age (years)	Diameter (mm)	T Stage	N Stage	M Stage	TNM Stage	Family History of Cancer	Personal History of Cancer	Smoking	Alcohol Consumption	Emphysema	Nodule Location	Number of Nodules	Type of Nodule	Margin	Cavity Sign	Vacuolar Sign	Spiculation Sign	Lobulation Sign	Pleural Indentation Sign	Calcification	Clustering Sign	Air Bronchogram	Central or Peripheral	Enlargement of Mediastinal Lymph Nodes	Pathological Value of Biopsy	CEA (Carcinoembryonic Antigen,ng/ml)	CYFRA 21-1 (Cytokeratin 19 Fragments,ng/ml)
no	male	73	59	3	3	1	4	no	no	yes	no	yes	right upper lobe of the lung	1	solid nodule	regular	no	no	yes	yes	yes	no	yes	yes	no	yes	Non-small cell lung cancer other than adenocarcinoma	4.18	0.88
yes	female	57	22	1	2	1	4	no	yes	no	no	no	right lower lobe of the lung	1	solid nodule	regular	no	yes	yes	yes	yes	no	yes	yes	no	yes	adenocarcinoma	61.41	1.19
yes	female	58	21	1	0	0	1	yes	yes	no	no	no	right middle lobe of the lung	1	solid nodule	regular	no	no	no	yes	no	no	yes	no	no	no	adenocarcinoma	1.85	3.18
no	male	56	37	2	1	1	4	yes	no	no	no	no	right lower lobe of the lung	1	solid nodule	regular	no	no	yes	yes	no	yes	no	no	no	no	Non-small cell lung cancer other than adenocarcinoma	2.9	7.19
yes	female	67	23	1	2	0	3	no	no	no	no	no	left lower lobe of the lung	1	solid nodule	regular	no	no	no	no	yes	no	yes	no	no	no	adenocarcinoma	1.94	3.82
no	male	77	17	1	3	1	4	no	no	yes	no	yes	right upper lobe of the lung	1	solid nodule	regular	no	no	yes	yes	yes	no	yes	no	no	no	adenocarcinoma	8.48	4.4
yes	male	30	15	1	3	1	4	no	no	no	no	no	right upper lobe of the lung	1	solid nodule	regular	no	no	yes	yes	no	no	yes	no	no	yes	adenocarcinoma	3.6	98.33
yes	female	51	65	3	1	1	4	yes	no	no	no	no	left lower lobe of the lung	1	solid nodule	regular	no	no	no	yes	no	yes	yes	yes	no	no	adenocarcinoma	57	14.36
yes	female	46	9	1	0	0	1	no	yes	no	no	no	right middle lobe of the lung	1	ground-glass nodule	regular	no	no	no	no	no	no	yes	no	no	no	adenocarcinoma	1.96	2.92
no	male	60	58	3	2	0	3	yes	no	yes	yes	no	right upper lobe of the lung	2	solid nodule	regular	no	no	no	no	yes	no	yes	yes	no	yes	Non-small cell lung cancer other than adenocarcinoma	2.41	1.3
yes	male	56	63	3	2	0	3	no	no	yes	yes	no	right lower lobe of the lung	1	solid nodule	regular	no	no	yes	no	yes	no	yes	yes	no	yes	adenocarcinoma	15.37	14.49
no	male	80	76	4	2	1	4	yes	no	yes	yes	yes	right lower lobe of the lung	1	solid nodule	regular	no	no	no	yes	no	no	yes	no	no	yes	Non-small cell lung cancer other than adenocarcinoma	14.24	10.32
no	male	68	29	1	2	0	3	yes	no	yes	no	yes	left upper lobe of the lung	1	solid nodule	regular	no	no	no	yes	no	no	yes	no	no	yes	Non-small cell lung cancer other than adenocarcinoma	2.83	2.64
yes	female	54	16	1	0	0	1	no	yes	no	no	no	right lower lobe of the lung	1	ground-glass nodule	regular	no	no	no	yes	no	no	yes	no	no	no	adenocarcinoma	2.22	2.88
yes	female	57	14	1	3	1	4	yes	no	no	no	no	left upper lobe of the lung	4	solid nodule	regular	no	no	no	no	yes	no	yes	no	no	no	adenocarcinoma	2.89	2.21
yes	female	65	38	2	3	0	3	yes	no	no	no	no	left upper lobe of the lung	4	solid nodule	regular	no	no	no	no	no	yes	yes	yes	no	yes	adenocarcinoma	8.41	12.79
no	male	70	49	2	2	0	3	no	no	yes	no	yes	left upper lobe of the lung	1	solid nodule	regular	no	no	yes	no	no	no	yes	no	no	yes	adenocarcinoma	5.23	7.92
no	male	66	34	2	0	0	1	no	no	no	no	no	right upper lobe of the lung	1	solid nodule	regular	no	no	yes	yes	no	no	yes	no	no	no	adenocarcinoma	28.39	3.31
yes	female	60	16	1	0	0	1	no	no	no	no	no	right upper lobe of the lung	4	solid nodule	regular	no	no	no	yes	yes	no	yes	no	no	no	adenocarcinoma	1.48	2.61
yes	male	54	46	2	1	0	2	no	no	yes	no	no	right lower lobe of the lung	4	solid nodule	regular	no	no	yes	yes	yes	no	yes	yes	no	no	adenocarcinoma	7.39	2.56
no	male	68	12	1	3	1	4	no	no	yes	yes	yes	right upper lobe of the lung	1	solid nodule	regular	no	no	yes	no	yes	no	yes	no	no	yes	adenocarcinoma	21.72	5.96
yes	female	57	61	3	3	1	4	no	no	no	no	no	right upper lobe of the lung	4	solid nodule	regular	no	no	yes	yes	yes	no	yes	yes	no	yes	adenocarcinoma	2.98	4.06
yes	female	44	28	1	2	1	4	no	no	no	no	no	right upper lobe of the lung	4	solid nodule	regular	no	no	yes	no	yes	no	yes	yes	no	yes	adenocarcinoma	7.43	3.64
yes	male	68	12	1	2	1	4	no	no	yes	yes	no	right upper lobe of the lung	4	solid nodule	regular	no	no	yes	yes	yes	no	yes	yes	no	yes	adenocarcinoma	24.73	7.42
no	male	69	52	3	3	1	4	no	yes	yes	no	yes	right upper lobe of the lung	1	solid nodule	regular	no	no	no	no	no	no	no	no	no	yes	adenocarcinoma	4.72	17.46
no	male	65	65	3	3	1	4	no	no	yes	yes	no	left upper lobe of the lung	1	solid nodule	regular	yes	no	no	yes	no	no	yes	yes	no	yes	adenocarcinoma	75.83	7.65
yes	male	75	54	3	3	1	4	no	no	yes	yes	no	left upper lobe of the lung	4	solid nodule	regular	no	no	yes	yes	yes	yes	yes	yes	no	yes	adenocarcinoma	142.94	7.09
no	male	71	19	1	0	0	1	no	no	yes	yes	no	right upper lobe of the lung	1	solid nodule	regular	no	no	no	no	no	no	yes	no	no	no	Non-small cell lung cancer other than adenocarcinoma	2.5	2.81
no	male	68	16	1	0	0	1	yes	no	yes	yes	yes	right upper lobe of the lung	1	solid nodule	regular	no	no	yes	yes	yes	no	yes	no	no	no	adenocarcinoma	1.62	1.69
yes	female	57	66	3	3	1	4	yes	yes	no	no	no	left upper lobe of the lung	1	solid nodule	regular	no	yes	no	yes	no	no	yes	no	no	yes	adenocarcinoma	3.78	8.06
no	male	69	29	1	0	0	1	yes	no	yes	yes	yes	left upper lobe of the lung	2	solid nodule	regular	no	no	no	yes	no	no	yes	yes	no	yes	Non-small cell lung cancer other than adenocarcinoma	3.21	3.3
yes	male	53	35	2	1	1	4	no	no	no	yes	no	left upper lobe of the lung	1	solid nodule	regular	no	no	no	no	yes	no	yes	yes	no	no	adenocarcinoma	4.05	1.62
yes	male	53	26	1	3	1	4	yes	no	no	yes	no	left upper lobe of the lung	4	solid nodule	regular	no	no	no	no	yes	yes	yes	yes	no	no	adenocarcinoma	672.6	13.25
yes	female	57	14	1	0	0	1	no	no	no	no	no	right middle lobe of the lung	2	subsolid nodule	regular	no	no	no	yes	yes	no	yes	no	no	no	adenocarcinoma	0.35	4.68
yes	male	54	38	2	3	1	4	no	no	yes	yes	no	left upper lobe of the lung	1	solid nodule	regular	no	no	no	yes	yes	no	yes	no	no	no	adenocarcinoma	19.92	3.06
yes	male	66	77	4	3	1	4	no	no	yes	no	no	right lower lobe of the lung	4	solid nodule	regular	no	no	no	no	yes	no	yes	yes	no	no	Non-small cell lung cancer other than adenocarcinoma	2174	26.86
no	male	68	23	1	0	0	1	no	no	no	yes	no	right middle lobe of the lung	1	subsolid nodule	regular	no	no	no	no	yes	no	yes	no	no	no	adenocarcinoma	2.49	2.09
yes	female	63	40	2	2	1	4	no	no	no	no	no	right lower lobe of the lung	4	solid nodule	regular	yes	no	no	yes	yes	no	yes	yes	no	yes	adenocarcinoma	5.54	2.39
no	male	56	47	2	1	1	4	no	no	yes	no	no	right middle lobe of the lung	2	solid nodule	regular	no	no	no	no	no	no	yes	no	no	yes	adenocarcinoma	0.85	3.33
no	female	65	70	3	0	1	4	no	no	no	no	no	right lower lobe of the lung	4	solid nodule	regular	yes	no	no	no	no	no	yes	no	no	no	adenocarcinoma	187.3	2.43
yes	male	71	17	1	3	0	3	no	no	yes	no	yes	right middle lobe of the lung	1	solid nodule	regular	no	no	no	yes	yes	no	yes	no	no	yes	adenocarcinoma	1535	7.01
yes	female	62	18	1	0	0	1	no	no	no	no	no	left upper lobe of the lung	1	ground-glass nodule	regular	no	no	no	no	no	no	yes	no	no	no	adenocarcinoma	1.96	3.4
no	female	68	40	2	0	0	1	no	no	no	no	no	right lower lobe of the lung	1	solid nodule	regular	no	no	no	no	no	no	yes	no	no	no	adenocarcinoma	3.17	1.53
no	male	57	41	2	3	1	4	no	no	no	no	no	left upper lobe of the lung	1	solid nodule	regular	no	no	no	no	no	no	no	no	no	yes	adenocarcinoma	4.23	2.51
no	male	64	39	2	2	0	3	no	yes	no	yes	yes	right upper lobe of the lung	1	solid nodule	regular	no	no	no	yes	no	no	yes	no	no	yes	Non-small cell lung cancer other than adenocarcinoma	4.33	4.5
yes	male	61	43	2	2	1	4	no	no	yes	yes	no	right middle lobe of the lung	4	solid nodule	regular	no	no	no	no	no	yes	yes	no	no	no	Non-small cell lung cancer other than adenocarcinoma	264.8	3.67
yes	female	50	7	1	0	0	1	yes	no	no	no	no	left upper lobe of the lung	1	solid nodule	regular	no	no	no	no	no	no	yes	no	no	no	adenocarcinoma	1.15	2.27
no	female	66	51	3	0	0	2	no	no	no	no	no	left lower lobe of the lung	1	solid nodule	regular	no	no	yes	yes	yes	no	yes	yes	no	yes	adenocarcinoma	1.22	0.77
no	male	70	64	3	2	0	3	yes	no	yes	yes	no	left lower lobe of the lung	1	solid nodule	regular	no	no	no	no	no	yes	yes	yes	no	yes	Non-small cell lung cancer other than adenocarcinoma	5.14	54.74
yes	female	74	14	1	0	0	1	no	no	no	no	no	right upper lobe of the lung	1	subsolid nodule	regular	no	no	no	no	yes	no	yes	no	no	no	adenocarcinoma	3.07	2
yes	female	51	24	1	0	0	1	no	no	no	no	no	right upper lobe of the lung	1	solid nodule	regular	no	no	yes	yes	yes	no	yes	yes	no	no	adenocarcinoma	8.79	1.17
no	male	47	16	1	3	1	4	no	no	no	no	no	left lower lobe of the lung	4	solid nodule	regular	no	no	no	yes	no	no	yes	no	no	no	Non-small cell lung cancer other than adenocarcinoma	3.6	13.82
no	female	68	27	1	0	0	1	no	yes	no	no	no	right middle lobe of the lung	1	solid nodule	regular	no	no	no	no	no	no	yes	no	no	no	adenocarcinoma	2.67	4.51
yes	female	63	21	1	3	1	4	no	no	no	no	no	left lower lobe of the lung	1	solid nodule	regular	no	yes	yes	no	yes	no	yes	no	no	yes	adenocarcinoma	4.35	14.49
yes	female	62	15.6	1	0	0	1	no	yes	no	no	no	right lower lobe of the lung	2	solid nodule	regular	no	no	no	yes	no	no	yes	yes	no	no	adenocarcinoma	4.03	0.78
yes	female	56	16	1	0	0	1	yes	no	no	no	no	right lower lobe of the lung	1	solid nodule	regular	no	yes	no	yes	yes	no	yes	no	no	no	adenocarcinoma	1.56	1.14
yes	male	73	76	4	3	1	4	no	no	no	no	no	left upper lobe of the lung	4	solid nodule	regular	no	no	no	no	no	no	yes	no	no	yes	adenocarcinoma	104.1	37.89
yes	female	69	28	1	0	0	1	no	no	no	no	no	right upper lobe of the lung	2	subsolid nodule	regular	no	no	no	yes	yes	no	yes	yes	no	no	adenocarcinoma	4.73	2.02
no	female	72	43	2	2	1	4	no	no	no	no	no	right upper lobe of the lung	4	solid nodule	regular	no	no	no	yes	yes	no	yes	no	no	yes	adenocarcinoma	12.47	2.18
yes	female	45	26	1	1	1	4	no	no	no	no	no	left upper lobe of the lung	2	solid nodule	regular	no	no	no	yes	yes	no	yes	yes	no	no	adenocarcinoma	10.02	2.52
yes	female	65	40	2	3	1	4	no	yes	no	no	no	right middle lobe of the lung	1	solid nodule	regular	no	no	no	no	yes	no	yes	yes	no	yes	adenocarcinoma	4.07	4.95
no	male	61	37	2	3	0	3	no	no	yes	yes	yes	right upper lobe of the lung	1	solid nodule	regular	no	no	yes	yes	no	no	yes	yes	no	no	adenocarcinoma	11.79	5.01
yes	male	73	53	3	2	1	4	no	no	yes	no	yes	right lower lobe of the lung	1	solid nodule	regular	no	no	yes	yes	yes	no	yes	no	no	yes	adenocarcinoma	30.26	5.53
yes	male	50	39	2	1	1	4	no	no	no	no	no	left lower lobe of the lung	4	solid nodule	regular	no	no	no	no	yes	no	yes	no	no	no	adenocarcinoma	43.13	2.04
yes	female	64	23	1	0	0	1	no	no	no	no	no	right upper lobe of the lung	1	solid nodule	regular	no	no	yes	yes	yes	no	yes	yes	no	no	adenocarcinoma	0.75	1.19
yes	female	56	37	2	3	1	4	no	yes	no	no	no	left lower lobe of the lung	4	solid nodule	regular	no	no	no	no	yes	no	yes	no	no	no	adenocarcinoma	39.56	3.74
yes	male	69	18	1	0	0	1	no	no	no	no	no	left lower lobe of the lung	1	ground-glass nodule	regular	no	no	no	yes	yes	no	yes	yes	no	no	adenocarcinoma	0.63	3.45
yes	male	52	21	1	0	0	1	no	no	yes	no	yes	right middle lobe of the lung	1	solid nodule	regular	yes	no	yes	yes	yes	no	yes	no	no	no	adenocarcinoma	4.16	3.08
yes	female	63	35	2	3	1	4	no	yes	no	no	no	left lower lobe of the lung	4	solid nodule	regular	no	no	no	no	yes	no	yes	no	no	yes	adenocarcinoma	57.61	6.25
yes	female	49	27	1	0	1	4	no	no	no	no	no	right upper lobe of the lung	4	solid nodule	regular	no	no	no	yes	no	no	yes	no	no	no	adenocarcinoma	12.91	3.45
no	female	49	32	2	0	0	1	no	yes	no	no	no	right upper lobe of the lung	1	subsolid nodule	regular	no	no	no	yes	yes	no	yes	yes	no	no	adenocarcinoma	1.58	1.75
no	male	73	81	4	3	1	4	yes	no	yes	yes	yes	right lower lobe of the lung	4	solid nodule	regular	no	no	no	yes	no	no	yes	yes	no	yes	Non-small cell lung cancer other than adenocarcinoma	239.5	225.1
yes	female	65	36	2	0	1	4	no	yes	no	no	no	right lower lobe of the lung	4	solid nodule	regular	no	yes	no	yes	yes	no	yes	yes	no	no	adenocarcinoma	1.12	3.84
yes	female	62	12	1	0	0	1	no	no	no	no	no	right upper lobe of the lung	1	ground-glass nodule	regular	no	no	no	no	no	no	yes	no	no	no	adenocarcinoma	1.09	2.12
yes	female	72	36	2	2	0	3	no	no	no	no	no	right lower lobe of the lung	1	solid nodule	regular	no	no	no	yes	yes	no	yes	no	no	no	adenocarcinoma	38.6	1.77
yes	male	50	20	1	1	1	4	yes	no	no	yes	no	right upper lobe of the lung	1	solid nodule	regular	no	no	no	yes	yes	no	yes	no	no	no	adenocarcinoma	6.44	10.67
yes	female	71	28	1	2	1	4	no	no	no	no	no	left upper lobe of the lung	1	solid nodule	regular	no	no	no	no	yes	no	yes	yes	no	no	adenocarcinoma	89.84	3.65
yes	female	50	14	2	0	0	1	no	yes	no	no	no	right upper lobe of the lung	4	ground-glass nodule	regular	no	no	no	no	no	no	yes	no	no	no	adenocarcinoma	0.7	1.75
yes	male	44	25	1	2	0	3	no	no	no	yes	no	right upper lobe of the lung	1	solid nodule	regular	no	yes	no	yes	no	no	yes	yes	no	no	adenocarcinoma	2.4	2.63
no	male	55	22	1	1	0	2	yes	yes	yes	yes	no	right upper lobe of the lung	1	solid nodule	regular	no	no	no	yes	yes	yes	yes	no	yes	no	Non-small cell lung cancer other than adenocarcinoma	1.74	2.41
no	male	75	47	2	1	0	2	no	no	yes	yes	no	right middle lobe of the lung	1	solid nodule	regular	no	no	no	yes	yes	yes	yes	no	no	no	Non-small cell lung cancer other than adenocarcinoma	2.98	6.43
no	female	55	24	1	3	0	3	no	no	no	no	no	right upper lobe of the lung	1	solid nodule	regular	no	no	no	yes	yes	no	yes	no	no	yes	adenocarcinoma	4.51	4.14
yes	male	63	34	2	1	1	4	no	no	no	no	no	left upper lobe of the lung	1	solid nodule	regular	no	no	no	yes	yes	yes	yes	no	no	no	adenocarcinoma	9.86	9.42
no	male	69	64	3	2	0	3	no	no	yes	yes	yes	right lower lobe of the lung	1	solid nodule	regular	yes	no	no	no	no	yes	yes	yes	no	yes	Non-small cell lung cancer other than adenocarcinoma	8.15	11.23
yes	female	61	30	1	2	1	4	no	no	no	no	no	right upper lobe of the lung	1	solid nodule	regular	no	no	no	no	no	no	yes	no	no	yes	adenocarcinoma	38.13	10
no	male	46	35	2	3	1	4	no	no	yes	no	yes	right upper lobe of the lung	1	solid nodule	regular	no	no	yes	yes	yes	no	yes	no	no	yes	adenocarcinoma	59.96	4.46
no	male	48	47	2	2	1	4	no	no	yes	no	yes	left upper lobe of the lung	1	solid nodule	regular	yes	no	no	yes	yes	yes	yes	yes	no	no	adenocarcinoma	1.69	15.13
no	female	59	39	2	2	1	4	no	yes	no	no	no	right lower lobe of the lung	4	solid nodule	regular	no	no	yes	yes	yes	yes	yes	yes	no	no	adenocarcinoma	16.3	3.53
yes	female	65	14	1	0	0	1	no	no	no	no	no	left upper lobe of the lung	1	solid nodule	regular	no	no	no	yes	yes	no	yes	yes	no	yes	adenocarcinoma	3.2	2.66
no	male	56	39	2	2	0	3	no	no	yes	yes	yes	right upper lobe of the lung	1	solid nodule	regular	no	yes	no	yes	yes	no	yes	yes	no	no	adenocarcinoma	3.62	2.6
no	male	65	74	4	2	1	4	no	no	yes	no	yes	left upper lobe of the lung	4	solid nodule	regular	no	no	no	yes	no	no	yes	no	no	yes	adenocarcinoma	5.05	63.28
no	male	72	73	4	2	0	3	no	no	yes	yes	yes	right upper lobe of the lung	1	solid nodule	regular	no	no	no	yes	no	no	yes	no	no	yes	Non-small cell lung cancer other than adenocarcinoma	26.5	4.51
yes	female	68	27	1	0	1	4	no	no	no	no	no	right upper lobe of the lung	2	solid nodule	regular	no	no	yes	yes	yes	no	yes	yes	no	no	adenocarcinoma	4.95	1.96
yes	male	64	19	1	1	1	4	yes	no	yes	yes	no	right upper lobe of the lung	1	solid nodule	regular	no	no	no	yes	yes	no	yes	no	no	no	adenocarcinoma	2.25	7.5
no	male	67	7	1	0	0	1	yes	no	yes	no	yes	left upper lobe of the lung	2	solid nodule	regular	no	no	no	no	no	no	yes	no	no	no	adenocarcinoma	56.03	2.26
no	male	60	13	1	0	0	1	no	no	yes	yes	yes	left upper lobe of the lung	1	ground-glass nodule	regular	no	no	no	no	no	no	yes	no	no	no	adenocarcinoma	4.493	1.24
yes	male	64	65	3	2	0	3	no	no	yes	yes	no	right lower lobe of the lung	1	solid nodule	regular	no	no	no	yes	yes	no	yes	yes	no	yes	adenocarcinoma	1.98	4.34
yes	female	55	33	2	0	1	4	no	no	no	no	no	left lower lobe of the lung	1	subsolid nodule	regular	no	no	no	no	yes	no	yes	yes	no	no	adenocarcinoma	2.18	2.21
no	male	52	60	3	2	0	3	no	no	yes	yes	yes	left upper lobe of the lung	1	solid nodule	regular	no	no	no	yes	yes	no	no	no	no	yes	Non-small cell lung cancer other than adenocarcinoma	4.81	19.59
yes	male	84	52	3	2	1	4	no	no	no	no	yes	right lower lobe of the lung	3	solid nodule	regular	no	no	no	no	yes	no	yes	no	no	yes	adenocarcinoma	2.71	19.51
no	male	47	29	1	3	1	4	no	no	yes	no	no	left upper lobe of the lung	1	solid nodule	regular	no	no	yes	yes	yes	yes	yes	no	no	yes	adenocarcinoma	3.68	1.73
yes	female	64	22	1	1	1	4	yes	no	no	no	no	left lower lobe of the lung	2	solid nodule	regular	no	no	no	no	no	no	yes	no	no	no	adenocarcinoma	9.06	4.18
yes	female	70	23	1	2	1	4	yes	no	no	no	no	left upper lobe of the lung	1	solid nodule	regular	no	no	no	yes	yes	no	yes	no	no	yes	adenocarcinoma	28.41	3.51
no	male	60	67	3	2	0	3	no	no	yes	yes	no	left upper lobe of the lung	1	solid nodule	regular	no	no	no	no	yes	no	yes	no	no	no	Non-small cell lung cancer other than adenocarcinoma	1.18	1.23
no	male	70	20	1	0	0	1	no	yes	yes	no	yes	left lower lobe of the lung	1	solid nodule	regular	no	yes	no	yes	yes	no	yes	no	no	no	adenocarcinoma	0.98	2.75
yes	female	52	9	1	0	0	1	yes	no	no	no	no	right upper lobe of the lung	1	solid nodule	regular	no	no	no	no	no	no	yes	no	no	no	adenocarcinoma	1.75	1.84
yes	male	52	15	1	0	0	1	no	no	no	no	no	right middle lobe of the lung	1	solid nodule	regular	no	no	no	yes	yes	no	yes	yes	no	no	adenocarcinoma	2.07	2.02
yes	male	60	43	2	1	1	4	no	no	no	no	no	right upper lobe of the lung	1	solid nodule	regular	no	no	no	yes	yes	no	yes	yes	no	no	adenocarcinoma	3.74	9.46
yes	male	72	38	2	3	1	4	no	no	no	no	yes	left lower lobe of the lung	1	solid nodule	regular	yes	no	no	yes	no	no	yes	no	no	no	Non-small cell lung cancer other than adenocarcinoma	2.72	4.79
no	male	67	40	2	3	0	3	no	no	yes	yes	yes	left upper lobe of the lung	1	solid nodule	regular	yes	no	no	yes	yes	yes	yes	yes	no	yes	Non-small cell lung cancer other than adenocarcinoma	9.44	6.14
yes	male	69	24	1	2	0	3	yes	no	no	no	yes	right lower lobe of the lung	1	solid nodule	regular	no	no	no	yes	yes	no	yes	no	no	no	adenocarcinoma	24.12	2.51
no	male	66	17	1	1	1	4	yes	no	yes	no	yes	left lower lobe of the lung	1	solid nodule	regular	no	yes	yes	yes	yes	no	yes	no	no	no	adenocarcinoma	4.71	3.63
yes	female	56	46	2	3	1	4	no	no	no	no	no	right upper lobe of the lung	1	solid nodule	regular	yes	no	no	yes	yes	no	yes	yes	no	yes	adenocarcinoma	1.51	2.79
yes	female	86	27	1	0	0	1	yes	yes	no	no	no	left lower lobe of the lung	1	solid nodule	regular	no	no	no	yes	yes	no	yes	no	no	no	adenocarcinoma	2.96	2.7
yes	female	49	28	1	2	1	4	no	no	no	no	no	right lower lobe of the lung	1	solid nodule	regular	no	yes	yes	yes	yes	no	yes	no	no	yes	adenocarcinoma	18.66	1.76
no	male	62	27	1	0	0	1	no	no	no	no	no	right lower lobe of the lung	1	solid nodule	regular	no	no	no	yes	no	no	no	no	no	no	Non-small cell lung cancer other than adenocarcinoma	11.09	4.04
yes	male	87	26	1	0	1	4	no	no	no	no	no	right upper lobe of the lung	1	solid nodule	regular	yes	no	no	no	no	no	yes	yes	no	no	adenocarcinoma	16.66	4.51
yes	female	52	18	1	3	0	3	no	no	no	no	no	left lower lobe of the lung	1	solid nodule	regular	no	no	no	yes	no	no	yes	no	no	yes	adenocarcinoma	195.8	5.54
no	male	64	71	4	3	1	4	yes	no	yes	yes	yes	right upper lobe of the lung	1	solid nodule	regular	yes	no	no	no	no	no	yes	no	yes	yes	Non-small cell lung cancer other than adenocarcinoma	3.63	5.71
yes	male	64	19	1	1	0	2	yes	no	no	no	no	left upper lobe of the lung	3	solid nodule	regular	no	no	yes	yes	yes	no	yes	yes	no	no	adenocarcinoma	3.69	2.51
no	male	44	34	2	3	1	4	yes	no	no	no	no	left upper lobe of the lung	2	solid nodule	regular	no	yes	no	yes	no	no	yes	yes	yes	yes	adenocarcinoma	10.72	10.93
yes	female	68	59	3	2	1	4	no	no	no	no	no	right upper lobe of the lung	2	solid nodule	regular	no	no	no	yes	yes	yes	yes	yes	no	yes	Non-small cell lung cancer other than adenocarcinoma	1.9	1.62
no	male	68	93	4	3	1	4	no	no	yes	no	yes	right lower lobe of the lung	4	solid nodule	regular	no	no	no	yes	no	yes	yes	no	no	yes	adenocarcinoma	3.79	26.03
yes	male	41	51	3	2	1	4	no	no	no	yes	no	left lower lobe of the lung	4	solid nodule	regular	no	no	no	no	no	no	yes	yes	no	no	adenocarcinoma	1.66	1.13
yes	female	56	16	1	0	0	1	no	no	no	no	no	left lower lobe of the lung	1	solid nodule	regular	yes	no	no	yes	yes	no	yes	no	no	no	adenocarcinoma	1.54	2.04
yes	male	51	18	1	0	1	4	no	no	no	no	no	left upper lobe of the lung	1	solid nodule	regular	no	no	no	yes	yes	no	yes	no	no	no	adenocarcinoma	6.92	1.12
yes	female	49	19	1	1	1	4	yes	no	no	no	no	right upper lobe of the lung	4	solid nodule	irregular	no	no	no	no	no	no	no	no	no	no	Non-small cell lung cancer other than adenocarcinoma	3.95	1.91
yes	female	53	23	1	0	0	1	no	no	no	no	no	left upper lobe of the lung	1	ground-glass nodule	regular	no	no	no	yes	no	no	yes	no	no	no	adenocarcinoma	2.82	5
yes	female	58	22	1	2	1	4	no	no	no	no	no	right upper lobe of the lung	4	solid nodule	regular	no	no	no	yes	no	no	yes	no	no	no	adenocarcinoma	2.51	1.98
no	male	66	67	3	1	0	3	no	no	no	no	no	right lower lobe of the lung	1	solid nodule	regular	no	no	yes	no	no	no	yes	yes	no	no	adenocarcinoma	1.75	5.18
yes	female	66	28	1	3	0	3	no	no	no	no	no	right lower lobe of the lung	1	solid nodule	regular	yes	no	no	yes	yes	no	yes	no	no	yes	adenocarcinoma	3.05	2.35
no	male	66	15	1	0	0	1	no	no	yes	no	yes	left upper lobe of the lung	1	solid nodule	regular	no	no	yes	no	no	no	yes	no	no	yes	Non-small cell lung cancer other than adenocarcinoma	1.67	2.37
yes	female	62	35	2	0	0	1	no	yes	no	no	no	left upper lobe of the lung	1	ground-glass nodule	regular	no	no	yes	yes	yes	no	yes	yes	no	no	adenocarcinoma	4.24	1.42
yes	female	60	25	1	1	0	2	no	no	no	no	no	right upper lobe of the lung	2	solid nodule	regular	no	no	yes	yes	yes	no	yes	yes	no	no	adenocarcinoma	10.57	0.98
yes	male	74	53	3	3	1	4	no	no	yes	yes	no	right upper lobe of the lung	1	solid nodule	regular	no	no	yes	yes	yes	no	yes	yes	yes	yes	adenocarcinoma	311.4	2.98
no	male	80	41	2	3	1	4	no	no	yes	no	yes	right lower lobe of the lung	1	solid nodule	regular	no	no	no	yes	no	no	yes	yes	yes	yes	Non-small cell lung cancer other than adenocarcinoma	5.26	2.75
yes	male	55	28	1	0	0	1	no	no	no	no	no	left upper lobe of the lung	1	solid nodule	regular	no	no	yes	yes	yes	no	yes	yes	yes	yes	adenocarcinoma	5.93	3.03
no	male	59	21	1	0	0	1	no	no	yes	yes	yes	left lower lobe of the lung	1	solid nodule	regular	no	no	yes	yes	no	no	yes	yes	no	no	adenocarcinoma	4.7	2.53
yes	female	55	25	1	0	0	1	no	no	no	no	no	right lower lobe of the lung	1	solid nodule	regular	no	no	yes	no	yes	no	yes	yes	no	no	adenocarcinoma	1.63	0.75
yes	male	52	60	3	2	0	3	no	no	yes	yes	no	right lower lobe of the lung	1	solid nodule	regular	no	no	yes	yes	yes	no	yes	yes	no	no	Non-small cell lung cancer other than adenocarcinoma	48.96	4.5
no	female	69	55	3	0	0	2	no	no	no	no	no	right lower lobe of the lung	1	solid nodule	regular	no	yes	yes	yes	yes	no	yes	yes	no	no	adenocarcinoma	1.9	2.69
yes	female	77	28	1	3	1	4	yes	no	no	no	no	left upper lobe of the lung	2	solid nodule	regular	no	no	yes	no	yes	no	yes	no	no	no	adenocarcinoma	86.9	4.74
no	female	50	49	2	1	0	2	no	no	no	no	no	right lower lobe of the lung	1	solid nodule	regular	yes	no	yes	yes	yes	yes	yes	yes	yes	no	adenocarcinoma	1.26	2.15
no	male	55	48	2	3	1	4	no	no	yes	no	yes	right upper lobe of the lung	1	solid nodule	regular	no	yes	yes	no	yes	yes	yes	yes	no	yes	adenocarcinoma	30.68	3.13
yes	male	49	36	2	0	0	1	yes	no	no	yes	no	left upper lobe of the lung	1	ground-glass nodule	regular	no	no	no	yes	yes	no	yes	yes	no	no	adenocarcinoma	0.99	1.22
yes	female	65	22	1	0	0	1	no	yes	no	no	no	right lower lobe of the lung	1	solid nodule	regular	no	yes	yes	yes	yes	no	yes	no	no	no	adenocarcinoma	2.42	0.91
yes	male	61	15	1	0	0	1	no	no	yes	no	no	left lower lobe of the lung	1	solid nodule	regular	no	no	yes	no	yes	no	yes	yes	no	no	adenocarcinoma	3.18	3.18
yes	female	43	40	2	3	1	4	no	no	no	no	no	right lower lobe of the lung	1	solid nodule	regular	no	no	yes	yes	yes	no	yes	yes	no	yes	adenocarcinoma	1.89	0.82
yes	female	63	21	1	3	0	3	no	yes	no	no	no	left upper lobe of the lung	1	solid nodule	regular	no	no	no	yes	yes	no	yes	yes	no	yes	adenocarcinoma	13.31	2.72
no	male	65	34	2	2	0	3	yes	no	yes	yes	no	right upper lobe of the lung	1	solid nodule	regular	no	no	yes	no	no	no	yes	yes	yes	no	adenocarcinoma	93.35	5.73
no	male	61	10	1	0	1	4	no	no	yes	yes	yes	left upper lobe of the lung	1	solid nodule	regular	no	no	no	no	yes	no	yes	no	no	yes	adenocarcinoma	4.36	1.53
no	male	49	13	1	3	1	4	no	yes	yes	yes	yes	right upper lobe of the lung	4	solid nodule	irregular	no	no	no	no	no	no	no	no	no	no	Non-small cell lung cancer other than adenocarcinoma	1.51	2.92
no	male	65	17	1	2	1	4	no	no	no	no	no	left lower lobe of the lung	1	solid nodule	regular	no	no	yes	yes	yes	no	yes	no	no	yes	adenocarcinoma	77.66	3.32
yes	male	66	10	1	1	1	4	no	no	no	no	yes	left lower lobe of the lung	4	solid nodule	regular	no	no	no	yes	yes	no	yes	no	no	no	adenocarcinoma	8.45	2.15
yes	male	46	9	1	0	1	4	no	no	yes	yes	no	left upper lobe of the lung	4	solid nodule	regular	no	no	yes	no	no	no	yes	yes	no	no	adenocarcinoma	1.64	2.46
no	female	44	38	2	0	0	1	no	no	no	no	no	right lower lobe of the lung	1	solid nodule	regular	yes	no	yes	yes	yes	yes	yes	yes	no	no	adenocarcinoma	1.1	1.51
no	female	66	35	2	3	0	3	no	no	no	no	no	right lower lobe of the lung	2	solid nodule	regular	no	no	yes	yes	no	no	yes	yes	no	yes	adenocarcinoma	4.13	3.4
no	male	57	53	3	3	0	3	no	no	yes	no	no	left upper lobe of the lung	1	solid nodule	regular	no	yes	yes	yes	no	no	yes	yes	no	yes	Non-small cell lung cancer other than adenocarcinoma	11.07	6.55
yes	female	56	24	1	3	1	4	no	no	no	no	no	right middle lobe of the lung	1	solid nodule	regular	no	no	no	yes	no	no	yes	no	no	no	adenocarcinoma	357.06	15.45
yes	female	67	19	1	0	0	1	no	no	no	no	no	right lower lobe of the lung	1	solid nodule	regular	no	no	yes	yes	yes	no	yes	no	no	no	adenocarcinoma	3.68	1.77
yes	male	62	50	2	3	1	4	yes	no	yes	no	no	left lower lobe of the lung	4	solid nodule	regular	no	no	yes	yes	yes	no	yes	yes	no	yes	adenocarcinoma	3.8	9.28
yes	male	73	29	1	0	1	4	yes	no	yes	yes	no	right upper lobe of the lung	3	solid nodule	regular	no	no	yes	yes	yes	no	yes	no	no	no	adenocarcinoma	3.26	3.28
yes	male	52	45	2	3	1	4	no	no	no	no	no	right middle lobe of the lung	4	solid nodule	regular	no	no	yes	yes	no	no	yes	yes	yes	yes	adenocarcinoma	3.68	7.53
no	female	57	23	1	0	1	4	no	no	no	no	no	left upper lobe of the lung	1	solid nodule	regular	no	no	yes	no	no	no	yes	yes	no	no	adenocarcinoma	1.8	1.58
yes	male	50	28	1	1	1	4	no	no	no	no	no	left upper lobe of the lung	1	solid nodule	regular	no	yes	yes	yes	yes	no	yes	no	no	no	adenocarcinoma	1.76	2.62
no	male	49	69	3	3	1	4	no	no	yes	yes	no	left lower lobe of the lung	1	solid nodule	regular	no	no	no	yes	no	no	yes	no	no	yes	adenocarcinoma	6.55	3.67
no	female	60	21	1	3	0	3	no	no	no	no	no	left upper lobe of the lung	4	solid nodule	regular	no	no	yes	yes	yes	no	yes	no	no	yes	adenocarcinoma	4.02	3.65
yes	female	61	66	3	3	1	4	yes	yes	no	no	no	left upper lobe of the lung	2	solid nodule	regular	no	no	no	no	yes	no	yes	yes	no	yes	adenocarcinoma	927	23.49
no	male	67	32	2	2	1	4	yes	no	yes	no	yes	right upper lobe of the lung	4	solid nodule	regular	no	no	yes	yes	yes	no	yes	yes	no	no	adenocarcinoma	278.4	4.35
no	male	71	28	1	1	1	4	no	no	no	no	no	right lower lobe of the lung	4	solid nodule	regular	no	no	no	yes	yes	no	yes	yes	no	no	adenocarcinoma	2.35	2.28
no	female	78	67	3	2	1	4	no	yes	no	no	no	left lower lobe of the lung	1	solid nodule	regular	no	no	no	no	no	yes	yes	no	no	yes	adenocarcinoma	24.48	6.39
no	female	44	38	2	2	1	4	no	yes	no	no	no	right upper lobe of the lung	1	solid nodule	regular	no	no	yes	yes	yes	no	yes	yes	no	yes	adenocarcinoma	10.95	2.57
no	male	63	34	2	2	1	4	no	no	no	no	no	left upper lobe of the lung	4	solid nodule	regular	no	no	yes	yes	yes	no	yes	yes	no	yes	adenocarcinoma	61.3	6.64
yes	female	64	22	1	2	1	4	no	no	no	no	no	left upper lobe of the lung	1	solid nodule	regular	no	yes	yes	no	yes	no	yes	yes	no	no	adenocarcinoma	164.9	5.99
yes	male	53	22	1	0	0	1	no	no	no	no	no	right upper lobe of the lung	1	solid nodule	regular	no	no	no	yes	yes	no	yes	no	no	yes	adenocarcinoma	1.36	1.95
yes	female	52	19	1	0	0	1	no	yes	no	no	no	left upper lobe of the lung	1	ground-glass nodule	regular	no	no	no	no	no	no	yes	no	no	no	adenocarcinoma	1.39	2.5
yes	female	52	22	1	0	1	4	no	no	no	no	no	left lower lobe of the lung	1	solid nodule	regular	no	no	yes	yes	yes	no	yes	yes	no	yes	adenocarcinoma	11.91	1.94
yes	female	65	46	3	3	1	4	no	no	no	no	no	right upper lobe of the lung	1	solid nodule	regular	no	no	yes	yes	yes	no	yes	yes	no	yes	adenocarcinoma	2.54	3.26
yes	male	54	42	2	0	0	2	no	no	yes	no	no	left upper lobe of the lung	1	solid nodule	regular	no	no	yes	yes	yes	no	yes	yes	no	no	adenocarcinoma	83.34	52.74
no	male	70	46	2	1	0	2	no	no	yes	no	yes	left lower lobe of the lung	2	solid nodule	regular	no	no	yes	yes	no	no	yes	yes	no	no	Non-small cell lung cancer other than adenocarcinoma	1.59	12.07
no	female	69	32	2	1	0	2	no	no	no	no	no	right lower lobe of the lung	1	solid nodule	regular	no	no	no	yes	yes	no	yes	yes	no	no	adenocarcinoma	3.05	1.7
yes	male	74	23	1	3	0	3	yes	no	yes	no	yes	right upper lobe of the lung	1	solid nodule	regular	no	no	yes	yes	yes	yes	yes	yes	no	yes	adenocarcinoma	14.73	2.8
yes	male	50	15	1	0	0	1	no	yes	no	no	no	left upper lobe of the lung	1	solid nodule	regular	no	no	no	no	yes	no	yes	no	no	yes	adenocarcinoma	4.4	1.7
no	male	71	60	3	0	1	4	no	no	yes	no	yes	right lower lobe of the lung	1	solid nodule	regular	no	no	yes	no	no	yes	yes	yes	no	no	adenocarcinoma	23.63	3.59
yes	female	73	25	1	3	1	4	yes	no	no	no	no	right upper lobe of the lung	1	solid nodule	regular	no	no	yes	yes	yes	no	yes	yes	no	yes	adenocarcinoma	19.83	4.05
yes	female	57	25	1	0	0	1	no	no	no	no	no	left upper lobe of the lung	1	subsolid nodule	regular	no	no	no	yes	yes	no	yes	yes	no	no	adenocarcinoma	2.08	2.94
yes	male	44	19	1	3	1	4	no	no	no	yes	no	right upper lobe of the lung	4	solid nodule	regular	no	no	yes	yes	yes	no	yes	yes	no	yes	adenocarcinoma	402.6	7.71
no	female	53	9	1	0	0	1	no	yes	no	no	no	right upper lobe of the lung	4	ground-glass nodule	irregular	no	no	no	no	no	no	yes	no	no	no	adenocarcinoma	1.06	1.22
yes	male	70	22	1	3	1	4	no	no	yes	yes	no	right upper lobe of the lung	1	solid nodule	regular	no	yes	yes	yes	no	no	yes	no	no	yes	Non-small cell lung cancer other than adenocarcinoma	2.82	3.32
yes	female	53	20	1	1	0	2	yes	no	no	no	no	right upper lobe of the lung	1	solid nodule	regular	no	no	yes	yes	yes	no	yes	no	no	no	adenocarcinoma	1.97	2.44
no	male	56	35	2	3	1	4	no	no	yes	no	no	right upper lobe of the lung	4	solid nodule	regular	no	no	yes	yes	yes	no	yes	no	no	yes	Non-small cell lung cancer other than adenocarcinoma	140.1	5.16
yes	male	62	20	1	0	1	4	yes	no	no	no	no	right upper lobe of the lung	1	solid nodule	regular	no	no	yes	yes	yes	no	yes	yes	no	no	adenocarcinoma	1.9	2.81
yes	female	76	30	1	1	1	4	no	no	no	no	no	left lower lobe of the lung	1	solid nodule	regular	no	no	yes	yes	no	no	yes	yes	no	no	adenocarcinoma	10.24	4.78
yes	female	55	33	2	3	1	4	no	no	no	no	no	right middle lobe of the lung	4	solid nodule	regular	no	no	no	no	no	no	yes	no	no	no	adenocarcinoma	11.88	7.11
yes	female	54	44	2	3	1	4	no	yes	no	no	no	right upper lobe of the lung	4	solid nodule	regular	no	no	no	no	yes	yes	yes	yes	no	no	adenocarcinoma	1.84	6.68
yes	female	57	34	2	0	0	1	no	no	no	no	no	left upper lobe of the lung	1	solid nodule	regular	no	no	yes	yes	yes	no	yes	no	no	no	adenocarcinoma	4.71	3.29
yes	female	76	15	1	2	1	4	no	no	no	no	no	right lower lobe of the lung	4	solid nodule	regular	no	no	no	yes	yes	no	yes	no	no	no	adenocarcinoma	9.86	2.84
no	male	59	61	3	0	1	4	no	no	no	no	no	right upper lobe of the lung	1	solid nodule	regular	no	no	no	yes	no	no	yes	no	no	no	adenocarcinoma	1.43	4.99
yes	male	53	30	1	1	1	4	no	no	no	no	no	left lower lobe of the lung	1	solid nodule	regular	no	no	yes	yes	yes	no	yes	yes	no	no	adenocarcinoma	32.19	3.09
yes	female	56	22	1	1	1	4	no	no	no	no	no	right middle lobe of the lung	4	solid nodule	regular	no	no	no	no	no	no	yes	no	no	no	adenocarcinoma	8.38	4.42
no	female	66	57	3	3	0	3	no	no	no	no	no	right upper lobe of the lung	1	solid nodule	regular	no	no	no	yes	no	no	yes	yes	no	yes	adenocarcinoma	2.44	24.94
yes	female	79	23	1	1	0	2	yes	no	no	no	no	left upper lobe of the lung	4	solid nodule	regular	no	no	yes	no	yes	no	yes	yes	no	yes	adenocarcinoma	6.95	3.39
yes	male	68	19	1	3	0	3	no	no	yes	yes	no	left upper lobe of the lung	1	solid nodule	regular	no	no	yes	yes	no	no	yes	yes	no	yes	adenocarcinoma	1.05	1.87
yes	male	62	26	1	0	0	1	no	no	no	no	no	right middle lobe of the lung	1	solid nodule	regular	no	no	yes	yes	no	no	yes	yes	no	no	adenocarcinoma	1.7	2.93
yes	female	48	21	1	0	0	1	yes	no	no	no	no	right upper lobe of the lung	1	solid nodule	regular	yes	no	yes	yes	yes	no	yes	yes	no	no	adenocarcinoma	4.14	2.34
yes	female	52	6	1	0	0	1	no	yes	no	no	no	left upper lobe of the lung	1	solid nodule	irregular	no	no	no	no	no	no	yes	no	no	no	adenocarcinoma	0.97	1.74
yes	female	76	36	2	3	1	4	no	yes	no	no	no	right upper lobe of the lung	1	solid nodule	regular	no	no	yes	yes	yes	no	yes	yes	no	no	adenocarcinoma	60.867	3.13
no	male	60	25	1	3	1	4	no	no	yes	no	no	left lower lobe of the lung	1	solid nodule	regular	no	yes	yes	no	yes	no	yes	yes	no	yes	adenocarcinoma	184	7.67
no	female	44	22	1	2	1	4	no	no	no	no	no	right upper lobe of the lung	4	solid nodule	regular	no	no	yes	yes	yes	no	yes	yes	no	no	adenocarcinoma	39.97	1.23
yes	female	55	28	1	2	1	4	no	no	no	no	no	left lower lobe of the lung	1	solid nodule	regular	no	no	no	no	no	no	yes	no	no	no	adenocarcinoma	2.34	1.56
yes	female	51	19	1	3	1	4	no	no	no	no	no	right lower lobe of the lung	4	solid nodule	regular	no	no	no	no	yes	no	yes	no	no	yes	adenocarcinoma	4.05	2.89
yes	female	78	67	3	2	1	4	no	no	no	no	no	left lower lobe of the lung	1	solid nodule	regular	no	no	no	no	no	no	yes	yes	no	yes	adenocarcinoma	833.9	33.08
no	female	67	58	3	3	1	4	no	no	no	no	no	left lower lobe of the lung	1	solid nodule	regular	no	no	no	yes	no	no	yes	no	no	yes	adenocarcinoma	14.17	3.14
yes	female	58	60	3	3	1	4	no	no	no	no	no	right lower lobe of the lung	4	solid nodule	regular	no	no	no	yes	yes	yes	yes	yes	no	yes	adenocarcinoma	479.4	11.82
yes	male	72	39	2	2	1	4	no	no	yes	yes	no	right middle lobe of the lung	1	solid nodule	regular	no	no	no	yes	yes	no	yes	yes	no	yes	adenocarcinoma	7.61	4.29
yes	male	46	38	2	0	0	1	no	no	yes	no	no	right lower lobe of the lung	4	solid nodule	regular	no	no	yes	yes	yes	yes	yes	yes	no	no	adenocarcinoma	4.45	1.23
yes	female	60	23	1	0	0	1	no	yes	no	no	no	left lower lobe of the lung	1	solid nodule	regular	yes	no	yes	yes	yes	no	yes	no	no	no	adenocarcinoma	2.26	2.53
yes	female	71	56	3	3	1	4	no	no	no	no	no	left lower lobe of the lung	4	solid nodule	regular	yes	no	no	yes	no	yes	yes	yes	no	yes	adenocarcinoma	7.8	19.67
yes	female	54	34	2	0	1	4	yes	no	no	no	no	right upper lobe of the lung	4	solid nodule	regular	no	no	no	yes	yes	no	yes	yes	no	no	adenocarcinoma	3.48	3.59
yes	female	63	41	2	1	0	2	no	no	no	no	no	right upper lobe of the lung	2	solid nodule	regular	no	no	yes	no	yes	no	yes	no	no	no	adenocarcinoma	449.788	1.8
yes	male	56	46	2	1	1	4	no	no	no	no	no	right upper lobe of the lung	1	solid nodule	regular	no	no	no	no	no	no	yes	no	no	no	adenocarcinoma	1.09	2.17
yes	female	74	54	3	2	0	3	no	no	no	no	no	right upper lobe of the lung	1	solid nodule	regular	no	no	no	yes	no	yes	yes	no	no	no	adenocarcinoma	17.6	13.63
yes	male	65	12	1	0	1	4	yes	no	yes	no	no	right upper lobe of the lung	4	solid nodule	regular	no	no	yes	no	no	no	no	no	no	no	adenocarcinoma	9.91	3.79
no	female	65	75	4	0	0	3	no	no	no	no	no	right middle lobe of the lung	4	solid nodule	regular	no	no	no	yes	no	no	yes	no	no	no	adenocarcinoma	2.83	1.39
no	male	71	37	2	3	1	4	no	no	no	no	yes	left upper lobe of the lung	1	solid nodule	regular	no	no	yes	yes	yes	no	yes	yes	no	yes	adenocarcinoma	52.41	16.56
yes	male	65	28	1	1	0	2	no	no	yes	no	no	left lower lobe of the lung	1	solid nodule	regular	no	no	no	no	no	no	yes	no	no	no	adenocarcinoma	4.19	1.07
yes	female	66	33	2	0	0	1	yes	no	no	no	no	right lower lobe of the lung	1	solid nodule	regular	no	no	yes	yes	yes	no	yes	yes	no	no	adenocarcinoma	1.6	1.58
yes	female	50	20	1	0	0	1	no	no	no	no	no	left upper lobe of the lung	1	solid nodule	regular	no	no	no	no	yes	no	yes	no	no	yes	adenocarcinoma	5.35	3.1
yes	male	88	18	1	0	0	1	no	no	yes	no	no	left upper lobe of the lung	1	subsolid nodule	regular	yes	no	yes	no	yes	no	yes	no	no	no	adenocarcinoma	2.29	0.55
yes	female	66	72	4	1	1	4	no	no	no	no	no	left upper lobe of the lung	1	solid nodule	regular	no	yes	no	yes	no	no	yes	yes	no	no	adenocarcinoma	83.28	11.83
yes	female	56	34	2	3	1	4	no	no	no	no	no	right upper lobe of the lung	1	solid nodule	regular	no	no	yes	yes	yes	no	yes	no	no	no	adenocarcinoma	4.13	1.74
no	male	71	28	1	2	1	4	no	no	yes	yes	yes	left upper lobe of the lung	1	solid nodule	regular	no	no	yes	yes	yes	no	yes	yes	no	yes	adenocarcinoma	158.3	4.37
yes	female	57	64	3	2	0	3	no	no	no	no	no	right lower lobe of the lung	1	solid nodule	regular	no	no	yes	yes	yes	yes	yes	yes	no	yes	adenocarcinoma	2.92	3.05
no	female	57	32	2	0	0	1	yes	no	no	no	no	left upper lobe of the lung	1	solid nodule	regular	no	no	no	no	no	no	yes	no	no	no	adenocarcinoma	8.02	1.05
yes	female	73	25	1	3	0	3	yes	no	no	no	no	right lower lobe of the lung	1	solid nodule	regular	no	no	no	yes	no	no	yes	no	no	yes	adenocarcinoma	60.86	9.84
yes	female	75	31	2	2	0	3	yes	no	no	no	no	right lower lobe of the lung	2	solid nodule	regular	no	no	yes	no	yes	no	yes	yes	no	no	adenocarcinoma	11.4	3.35
no	male	74	30	1	0	0	1	no	yes	no	no	yes	left upper lobe of the lung	1	solid nodule	regular	yes	no	yes	yes	yes	no	yes	yes	no	no	adenocarcinoma	4.9	3.09
no	male	74	31	2	2	0	3	no	no	no	no	no	right lower lobe of the lung	1	solid nodule	regular	no	no	yes	no	no	yes	no	no	no	yes	Non-small cell lung cancer other than adenocarcinoma	3.92	3.8
no	male	50	42	2	3	0	3	no	no	yes	no	yes	right upper lobe of the lung	1	solid nodule	regular	no	no	yes	yes	yes	no	no	no	no	yes	adenocarcinoma	39.07	6.27
yes	male	63	32	2	0	0	1	yes	no	yes	yes	no	left upper lobe of the lung	1	solid nodule	regular	no	no	yes	yes	yes	no	yes	no	no	yes	adenocarcinoma	2.28	4.2
yes	male	51	38	2	0	1	4	yes	no	yes	yes	no	right lower lobe of the lung	4	solid nodule	regular	no	no	yes	yes	yes	no	yes	yes	no	no	adenocarcinoma	2.68	4.25
yes	female	60	45	2	2	0	3	yes	no	no	no	no	right upper lobe of the lung	1	solid nodule	regular	no	no	no	yes	yes	no	yes	no	no	yes	Non-small cell lung cancer other than adenocarcinoma	7.64	2.43
no	male	60	61	3	3	0	3	yes	no	yes	no	yes	right lower lobe of the lung	1	solid nodule	regular	no	no	no	no	no	yes	no	yes	yes	yes	Non-small cell lung cancer other than adenocarcinoma	3.16	8.18
yes	male	51	26	1	3	0	3	no	no	yes	yes	no	right upper lobe of the lung	4	solid nodule	regular	no	no	no	yes	yes	no	yes	yes	no	yes	adenocarcinoma	34.37	26.83
yes	female	50	32	2	1	0	2	no	yes	no	no	no	left lower lobe of the lung	1	solid nodule	regular	no	no	yes	yes	yes	no	yes	yes	no	no	adenocarcinoma	58.21	6.68
no	male	74	79	4	2	0	3	no	no	yes	yes	yes	right lower lobe of the lung	1	solid nodule	regular	no	no	no	no	no	no	yes	yes	no	yes	Non-small cell lung cancer other than adenocarcinoma	5.67	41.15
yes	male	56	35	2	3	0	3	no	yes	yes	no	no	left upper lobe of the lung	1	solid nodule	regular	no	no	no	no	no	no	yes	no	no	no	adenocarcinoma	30.58	4.39
yes	male	82	57	3	3	0	3	no	yes	no	no	no	left upper lobe of the lung	1	solid nodule	regular	no	no	yes	no	no	no	yes	yes	no	yes	adenocarcinoma	12.77	7.11
yes	male	71	27	1	0	0	1	no	no	no	no	no	left upper lobe of the lung	1	solid nodule	regular	no	no	yes	no	yes	no	yes	yes	no	no	adenocarcinoma	3.69	1.53
